# Supplementary material for: Diurnal variation of the human adipose transcriptome and the link to metabolic disease
Source: PubMed Central journal article supplement (PMC2647943; doi:10.1186/1755-8794-2-7), 2009-02-09
Supplement: 1755-8794-2-7-S5.pdf [file 1755-8794-2-7-S5.pdf]

| Transcri pt     | pval         |
|-----------------|--------------|
| NM_004920       | 0            |
| NM_080282       | 0            |
| NM_172346       | 0            |
| NM_000392       | 0            |
| NM_016818       | 0            |
| NM_152924       | 1. 88156E-10 |
| Conti g56303_RC | 1. 84514E-11 |
| NM_005158       | 0            |
| NM_138326       | 0. 000858865 |
| NM_004458       | 4. 49857E-05 |
| NM_022977       | 5. 27636E-09 |
| NM_001109       | 0            |
| NM_006988       | 2. 32894E-10 |
| NM_020249       | 0            |
| NM_182920       | 4. 77396E-14 |
| NM_001124       | 2. 88166E-09 |
| AF086149        | 0            |
| AF086543        | 3. 10766E-11 |
| NM_024524       | 2. 23944E-11 |
| NM_000685       | 2. 9754E-14  |
| NM_004835       | 0            |
| AK001060        | 1. 19904E-14 |
| AK001808        | 7. 16573E-11 |
| AK023363        | 4. 46728E-11 |
| AK023526        | 0            |
| AK054990        | 0            |
| AK055302        | 2. 24232E-12 |
| AK056146        | 1. 25921E-07 |
| AK057578        | 0            |
| NM_000693       | 5. 83787E-05 |
| NM_001634       | 0            |
| NM_153206       | 1. 90026E-07 |
| NM_139314       | 2. 07057E-13 |
| NM_173505       | 3. 21965E-15 |
| NM_145699       | 0            |
| NM_030882       | 2. 58105E-12 |
| NM_145637       | 1. 27923E-11 |
| NM_020979       | 0            |
| NM_020980       | 2. 33749E-06 |
| NM_001657       | 0            |
| NM_021069       | 0            |
| AF038193        | 1. 08821E-11 |
| NM_178815       | 6. 32827E-15 |
| NM_177949       | 2. 46569E-12 |
| NM_001674       | 1. 11022E-16 |
| NM_004024       | 0            |
| NM_033027       | 0            |
| NM_032047       | 1. 55983E-11 |
| NM_004776       | 0            |
| NM_001186       | 2. 55791E-05 |
| NM_006317       | 1. 11022E-16 |
| NM_006399       | 0            |
| NM_182648       | 4. 62963E-14 |
| NM_004049       | 6. 4122E-12  |
| NM_005178       | 0            |
| NM_003670       | 0            |
| AL133599        | 1. 3981E-12  |
| NM_001725       | 2. 00441E-07 |
| NM_144653       | 0            |
| NM_024850       | 5. 84033E-12 |
| NM_004053       | 0            |
| NM_007021       | 1. 53444E-12 |
| NM_173554       | 2. 46417E-09 |
| NM_025113       | 4. 75443E-09 |

|                 |              |
|-----------------|--------------|
| Conti g37037_RC | 2. 54241E-14 |
| NM_032245       | 0            |
| NM_030806       | 5. 60663E-14 |
| NM_022083       | 2. 55908E-05 |
| NM_004848       | 4. 79471E-08 |
| NM_030945       | 3. 33067E-16 |
| NM_018152       | 1. 11022E-16 |
| NM_178817       | 2. 22045E-16 |
| NM_144629       | 0            |
| NM_022912       | 0            |
| NM_000592       | 0            |
| NM_145316       | 1. 01285E-10 |
| NM_181714       | 1. 24356E-12 |
| NM_153362       | 5. 55112E-16 |
| Conti g47220    | 4. 151E-08   |
| NM_005181       | 8. 82678E-09 |
| X02330          | 1. 30095E-09 |
| NM_005795       | 0            |
| NM_022162       | 7. 86383E-11 |
| NM_004347       | 4. 44611E-12 |
| NM_182511       | 4. 9217E-11  |
| NM_002986       | 4. 511E-08   |
| NM_002988       | 1. 84154E-06 |
| NM_002982       | 0            |
| NM_002983       | 0            |
| NM_002984       | 1. 43381E-07 |
| NM_006273       | 0            |
| NM_005623       | 0            |
| NM_020307       | 8. 34114E-05 |
| NM_001295       | 0            |
| NM_003965       | 0            |
| NM_000591       | 3. 62044E-13 |
| NM_001773       | 1. 0949E-12  |
| NM_003503       | 5. 18075E-10 |
| NM_022842       | 4. 44089E-16 |
| NM_000389       | 0            |
| NM_001262       | 7. 61613E-14 |
| NM_021146       | 2. 32037E-14 |
| NM_001712       | 0            |
| NM_005195       | 0            |
| NM_003956       | 0            |
| NM_015424       | 0            |
| NM_014918       | 9. 10383E-15 |
| NM_013324       | 1. 64902E-06 |
| NM_144673       | 1. 44329E-15 |
| NM_013246       | 5. 21805E-15 |
| NM_005602       | 0            |
| NM_022570       | 0. 000568026 |
| NM_013252       | 2. 98827E-11 |
| NM_007261       | 8. 70815E-06 |
| NM_000088       | 9. 39233E-06 |
| NM_152890       | 0            |
| NM_032161       | 4. 30378E-08 |
| NM_033427       | 2. 38132E-12 |
| NM_000573       | 1. 11246E-07 |
| AK021493        | 3. 86691E-13 |
| NM_001881       | 1. 23124E-13 |
| NM_001882       | 4. 49175E-08 |
| NM_000758       | 9. 59849E-11 |
| NM_000760       | 1. 11022E-16 |
| NM_004385       | 1. 70192E-10 |
| NM_024792       | 0            |
| NM_001905       | 0            |
| NM_001912       | 0            |
| NM_001511       | 0            |

|                 |              |
|-----------------|--------------|
| NM_002089       | 0            |
| NM_002090       | 1. 6283E-05  |
| AB051463        | 1. 03677E-11 |
| NM_000104       | 9. 27948E-07 |
| NM_023944       | 2. 22045E-16 |
| NM_001554       | 0            |
| Conti g40298_RC | 9. 32587E-15 |
| NM_080759       | 7. 80999E-11 |
| AF318336        | 0            |
| NM_000574       | 1. 02147E-08 |
| Conti g8156_RC  | 1. 07137E-07 |
| NM_178152       | 4. 35418E-12 |
| NM_032636       | 1. 11022E-15 |
| NM_019058       | 0            |
| NM_004728       | 0            |
| NM_022779       | 0            |
| NM_004084       | 0. 000139226 |
| NM_005217       | 1. 30167E-09 |
| NM_022783       | 0            |
| NM_031476       | 0            |
| NM_030817       | 0            |
| AK025205        | 1. 11022E-16 |
| NM_032297       | 0            |
| NM_013253       | 4. 38538E-14 |
| NM_015569       | 0            |
| NM_001945       | 4. 50751E-14 |
| NM_004417       | 1. 60938E-06 |
| NM_004418       | 0            |
| NM_001394       | 0            |
| NM_057158       | 0            |
| NM_001946       | 9. 63765E-09 |
| NM_032411       | 4. 44089E-16 |
| Conti g45618_RC | 3. 08698E-08 |
| NM_001955       | 1. 77248E-11 |
| NM_001964       | 0            |
| NM_000399       | 3. 10862E-15 |
| NM_004430       | 2. 22045E-16 |
| NM_152310       | 1. 27126E-07 |
| NM_152939       | 1. 32182E-08 |
| AL137578        | 7. 47002E-12 |
| ENST00000274652 | 0. 000887177 |
| ENST00000278205 | 4. 22662E-13 |
| NM_005797       | 0            |
| NM_024582       | 2. 62502E-07 |
| NM_058229       | 0            |
| NM_002001       | 4. 44089E-16 |
| NM_000566       | 6. 14428E-10 |
| NM_021642       | 1. 55364E-05 |
| NM_031935       | 8. 5703E-11  |
| NM_054014       | 0            |
| NM_004118       | 7. 75142E-08 |
| NM_018059       | 0            |
| Conti g37439_RC | 1. 80274E-06 |
| NM_018349       | 1. 20807E-08 |
| NM_022767       | 0            |
| NM_024709       | 1. 77862E-11 |
| Conti g56160_RC | 0            |
| NM_032849       | 1. 14353E-14 |
| NM_032213       | 4. 00588E-07 |
| Conti g29921_RC | 5. 27272E-10 |
| NM_024730       | 3. 10269E-08 |
| NM_022837       | 3. 33067E-16 |
| NM_024636       | 3. 18624E-10 |
| NM_024616       | 1. 12577E-12 |
| NM_024574       | 5. 65914E-10 |

|                 |              |
|-----------------|--------------|
| NM_025079       | 0            |
| NM_024530       | 0            |
| Conti g23475_RC | 0            |
| NM_182573       | 1. 89293E-12 |
| NM_152320       | 5. 45798E-09 |
| NM_144669       | 0            |
| NM_152680       | 9. 55735E-06 |
| NM_152502       | 2. 29033E-07 |
| Conti g43338_RC | 1. 15939E-09 |
| NM_144649       | 2. 41825E-05 |
| NM_152608       | 0            |
| NM_175884       | 8. 54872E-15 |
| Conti g53242_RC | 2. 78149E-07 |
| NM_152665       | 2. 94863E-07 |
| NM_153690       | 3. 33067E-16 |
| NM_153692       | 5. 81942E-11 |
| NM_013231       | 6. 69464E-14 |
| AB058769        | 4. 60195E-07 |
| NM_022823       | 0            |
| NM_153756       | 9. 65894E-15 |
| NM_005252       | 1. 5527E-06  |
| NM_002029       | 0            |
| NM_174938       | 2. 54241E-14 |
| NM_015440       | 1. 11022E-16 |
| NM_015675       | 5. 9619E-14  |
| NM_022134       | 1. 16673E-12 |
| NM_024637       | 0            |
| NM_014863       | 2. 47491E-11 |
| NM_015892       | 9. 11493E-14 |
| NM_005257       | 1. 25919E-07 |
| NM_001486       | 0            |
| NM_004864       | 0            |
| NM_005110       | 0. 000561411 |
| NM_017655       | 0            |
| Conti g40478_RC | 7. 14617E-12 |
| Conti g5961_RC  | 1. 05471E-14 |
| NM_002069       | 2. 19824E-14 |
| NM_001505       | 1. 44329E-15 |
| NM_005300       | 2. 89856E-06 |
| NM_005282       | 0            |
| NM_005304       | 0            |
| NM_005310       | 1. 76581E-07 |
| NM_173849       | 7. 78266E-13 |
| NM_000854       | 1. 96453E-08 |
| NM_016315       | 2. 58815E-08 |
| NM_002108       | 1. 47654E-05 |
| NM_021175       | 9. 45455E-12 |
| NM_178232       | 1. 11022E-16 |
| NM_001523       | 0            |
| NM_002110       | 3. 98744E-07 |
| NM_012258       | 1. 401E-09   |
| NM_153236       | 4. 16334E-14 |
| Conti g40128_RC | 0            |
| NM_001530       | 2. 52842E-12 |
| NM_181054       | 0            |
| NM_022462       | 3. 08133E-09 |
| NM_145899       | 5. 7454E-13  |
| AF131827        | 0            |
| NM_002133       | 0            |
| NM_004503       | 1. 63759E-10 |
| NM_153693       | 1. 144E-08   |
| Conti g53965_RC | 6. 0407E-10  |
| NM_000196       | 5. 78971E-11 |
| NM_016391       | 0            |
| NM_006644       | 7. 03326E-13 |

|                 |              |
|-----------------|--------------|
| AJ227898        | 0            |
| AJ276240        | 8. 68083E-13 |
| NM_153341       | 1. 11022E-16 |
| NM_004907       | 0            |
| NM_003897       | 0            |
| NM_005531       | 0            |
| NM_006332       | 1. 37411E-10 |
| NM_000618       | 5. 30687E-14 |
| L27560          | 0            |
| NM_000599       | 2. 72276E-10 |
| NM_178822       | 1. 66655E-10 |
| NM_005849       | 8. 79086E-08 |
| NM_054111       | 4. 14446E-05 |
| NM_000572       | 0            |
| NM_002188       | 0            |
| NM_003855       | 7. 23865E-14 |
| NM_003853       | 8. 28734E-11 |
| NM_000576       | 0            |
| NM_004633       | 6. 99668E-05 |
| NM_000577       | 1. 26976E-12 |
| NM_014432       | 0. 000138982 |
| NM_000418       | 0            |
| NM_000600       | 0            |
| NM_000584       | 0            |
| NM_001557       | 6. 5592E-13  |
| NM_002193       | 1. 11022E-15 |
| NM_005542       | 0            |
| NM_002198       | 0            |
| NM_002201       | 0            |
| NM_002205       | 0            |
| NM_000887       | 3. 55271E-15 |
| Conti g55048_RC | 0            |
| AB002344        | 0            |
| NM_002229       | 0            |
| NM_030929       | 0            |
| AB067508        | 6. 31273E-13 |
| NM_002243       | 0            |
| NM_170736       | 1. 11022E-16 |
| NM_000891       | 1. 13706E-10 |
| NM_003740       | 0            |
| NM_014734       | 2. 38025E-10 |
| NM_015179       | 0            |
| NM_014963       | 0            |
| AB033065        | 5. 94173E-07 |
| AB037766        | 3. 92824E-11 |
| AB040938        | 0            |
| AB051458        | 0            |
| NM_032550       | 0            |
| NM_032873       | 5. 60414E-08 |
| NM_014079       | 2. 211E-07   |
| NM_130446       | 2. 97775E-08 |
| NM_005559       | 0            |
| NM_005565       | 0            |
| NM_000527       | 0            |
| NM_002309       | 2. 00375E-11 |
| NM_006864       | 0            |
| NM_016733       | 1. 11022E-16 |
| NM_005569       | 1. 11022E-16 |
| NM_006033       | 3. 36794E-10 |
| NM_021250       | 0            |
| NM_004862       | 0            |
| NM_002315       | 1. 11022E-16 |
| NM_052879       | 0            |
| Conti g38772_RC | 1. 11022E-16 |
| NM_178833       | 0            |

|                 |              |
|-----------------|--------------|
| NM_144697       | 0            |
| NM_145282       | 8. 5407E-10  |
| NM_174918       | 0            |
| NM_175903       | 1. 78501E-07 |
| Conti g63026    | 0            |
| AW673036_RC     | 6. 56514E-11 |
| ENST00000295549 | 0            |
| Conti g4595     | 0            |
| NM_016644       | 0            |
| NM_018687       | 1. 84131E-08 |
| NM_020143       | 3. 87681E-07 |
| NM_030802       | 0            |
| NM_053040       | 0            |
| NM_138779       | 1. 76759E-12 |
| NM_015236       | 6. 51701E-14 |
| NM_052972       | 0            |
| NM_181726       | 0            |
| NM_018334       | 0            |
| NM_032808       | 1. 12133E-14 |
| NM_005584       | 4. 12754E-11 |
| Conti g46202    | 1. 44351E-09 |
| NM_012323       | 0            |
| NM_030801       | 0            |
| NM_031419       | 0            |
| NM_005906       | 1. 09896E-09 |
| NM_052886       | 1. 00928E-11 |
| NM_153267       | 3. 72869E-09 |
| NM_005204       | 7. 13789E-08 |
| AK054569        | 0            |
| NM_005911       | 0            |
| NM_182763       | 0            |
| NM_005924       | 1. 50468E-08 |
| NM_138395       | 0            |
| NM_052943       | 8. 0883E-10  |
| NM_152421       | 1. 22125E-14 |
| NM_144683       | 2. 43024E-10 |
| NM_152430       | 2. 22045E-15 |
| NM_152339       | 0            |
| NM_152435       | 7. 83273E-12 |
| Conti g29982_RC | 3. 77476E-15 |
| NM_052871       | 1. 51615E-11 |
| AL512725        | 0            |
| NM_032390       | 0            |
| NM_024101       | 5. 18685E-12 |
| NM_022468       | 3. 33067E-16 |
| NM_022718       | 6. 4837E-14  |
| NM_022122       | 2. 6701E-07  |
| NM_002422       | 0            |
| NM_005098       | 5. 24913E-13 |
| NM_005946       | 0            |
| NM_005951       | 1. 8743E-10  |
| NM_175622       | 0            |
| NM_176870       | 0            |
| NM_002450       | 3. 33067E-16 |
| NM_005952       | 2. 19158E-13 |
| NM_005953       | 6. 66134E-15 |
| NM_006636       | 9. 50906E-13 |
| NM_138299       | 2. 3237E-13  |
| NM_002463       | 1. 64602E-12 |
| NM_000256       | 4. 27742E-10 |
| NM_004997       | 3. 21965E-15 |
| NM_002467       | 0            |
| NM_002474       | 8. 46735E-05 |
| AK025953        | 3. 83027E-14 |
| NM_012335       | 5. 62395E-10 |

|                 |              |
|-----------------|--------------|
| AK054570        | 0            |
| NM_000433       | 5. 74762E-12 |
| NM_014397       | 0            |
| NM_080741       | 0            |
| NM_002502       | 4. 21885E-15 |
| NM_006167       | 0            |
| NM_015039       | 0            |
| NM_006169       | 0            |
| NM_006170       | 0            |
| NM_006392       | 0            |
| NM_004741       | 0            |
| NM_020962       | 8. 88178E-15 |
| NM_000270       | 0            |
| NM_002523       | 6. 66134E-16 |
| NM_000910       | 5. 64215E-05 |
| NM_002135       | 0            |
| NM_173198       | 0            |
| NM_004883       | 1. 44329E-15 |
| NM_013981       | 6. 65024E-14 |
| NM_013982       | 1. 86406E-13 |
| NM_014366       | 7. 69385E-14 |
| NM_021229       | 6. 66134E-16 |
| NM_139131       | 0            |
| NM_014778       | 5. 24025E-14 |
| NM_007225       | 6. 15294E-05 |
| NM_013248       | 0            |
| NM_014279       | 2. 9976E-15  |
| NM_020190       | 2. 97651E-13 |
| NM_020530       | 0            |
| NM_053001       | 0            |
| NM_012387       | 1. 43683E-10 |
| Conti g51888_RC | 4. 07249E-06 |
| NM_015368       | 1. 11022E-16 |
| NM_005746       | 1. 34004E-13 |
| NM_182790       | 4. 97924E-09 |
| AL137559        | 0            |
| NM_000439       | 1. 412E-09   |
| NM_021830       | 0            |
| NM_002616       | 0            |
| NM_004427       | 0            |
| AK026181        | 5. 56444E-13 |
| Conti g54031    | 1. 67533E-13 |
| Conti g53952_RC | 9. 17596E-05 |
| NM_012417       | 6. 90619E-07 |
| Conti g43433_RC | 1. 0206E-08  |
| NM_022062       | 9. 97991E-12 |
| NM_000299       | 1. 12002E-11 |
| NM_024420       | 1. 07703E-11 |
| NM_000929       | 0            |
| NM_000930       | 3. 88578E-15 |
| NM_002658       | 2. 72112E-11 |
| AB033035        | 3. 46443E-06 |
| NM_004073       | 0            |
| NM_021105       | 5. 556E-08   |
| NM_021127       | 7. 78266E-12 |
| NM_015029       | 1. 22125E-15 |
| NM_002705       | 3. 9968E-15  |
| NM_014330       | 3. 41949E-14 |
| NM_015062       | 0            |
| NM_020820       | 4. 77182E-11 |
| NM_002727       | 1. 74768E-08 |
| AK055479        | 0            |
| NM_021935       | 0            |
| NM_017456       | 9. 99201E-16 |
| NM_130435       | 5. 87921E-11 |

|                 |              |
|-----------------|--------------|
| NM_006504       | 9. 02171E-08 |
| NM_002852       | 0            |
| NM_025215       | 0            |
| NM_006505       | 0            |
| NM_017817       | 1. 11022E-16 |
| AK055564        | 0            |
| NM_003979       | 0            |
| NM_000964       | 0            |
| NM_170774       | 4. 39648E-14 |
| NM_031437       | 7. 3797E-08  |
| NM_006509       | 0            |
| NM_032918       | 1. 6323E-07  |
| NM_153615       | 3. 096E-11   |
| NM_002928       | 0            |
| NM_002923       | 9. 66038E-12 |
| NM_015444       | 0            |
| NM_024787       | 0            |
| NM_024778       | 0            |
| NM_173647       | 8. 87864E-11 |
| NM_015169       | 0            |
| NM_001754       | 0            |
| NM_002964       | 0            |
| NM_002965       | 2. 03682E-12 |
| NM_005980       | 1. 44329E-15 |
| NM_030754       | 1. 98308E-12 |
| NM_022136       | 0. 000544437 |
| NM_178135       | 8. 09131E-13 |
| NM_006998       | 2. 22045E-16 |
| NM_003004       | 0            |
| NM_000450       | 8. 42981E-12 |
| NM_000655       | 8. 17131E-09 |
| NM_004186       | 0            |
| NM_017789       | 1. 56541E-14 |
| NM_030666       | 1. 71648E-11 |
| NM_002575       | 2. 26969E-07 |
| NM_002640       | 0            |
| NM_000602       | 9. 32576E-12 |
| NM_005025       | 4. 70287E-09 |
| NM_013376       | 0            |
| NM_019605       | 5. 25013E-12 |
| NM_005627       | 6. 03595E-12 |
| Conti g60194_RC | 0            |
| NM_173216       | 0            |
| NM_018414       | 2. 66454E-15 |
| NM_152996       | 0            |
| NM_005982       | 2. 2282E-11  |
| NM_006748       | 9. 6099E-05  |
| NM_004207       | 0            |
| NM_006996       | 3. 87701E-09 |
| NM_007105       | 0            |
| NM_003059       | 3. 33746E-06 |
| AK057476        | 2. 22045E-16 |
| AB067483        | 2. 22045E-16 |
| NM_153449       | 3. 55271E-15 |
| NM_006931       | 0            |
| NM_003039       | 1. 6477E-11  |
| D31887          | 2. 97196E-12 |
| NM_003615       | 0            |
| Conti g56768_RC | 6. 02264E-07 |
| AL050021        | 0            |
| NM_003486       | 0            |
| NM_016354       | 9. 84492E-10 |
| NM_030952       | 1. 34115E-13 |
| NM_173354       | 0            |
| NM_018664       | 0            |



|                 |              |
|-----------------|--------------|
| NM_003498       | 0            |
| NM_000636       | 0            |
| Conti g40954_RC | 0. 000128792 |
| NM_031439       | 1. 48065E-11 |
| NM_021972       | 0            |
| NM_152594       | 3. 11071E-08 |
| NM_080862       | 9. 41669E-10 |
| AB037721        | 0            |
| NM_004760       | 1. 11022E-16 |
| NM_014465       | 3. 74272E-07 |
| NM_004711       | 1. 02141E-14 |
| NM_006474       | 0            |
| NM_052864       | 2. 69127E-10 |
| NM_032505       | 0            |
| NM_015472       | 1. 09024E-12 |
| NM_018421       | 0            |
| NM_003213       | 0            |
| NM_003236       | 0            |
| NM_000361       | 2. 26146E-10 |
| NM_013390       | 2. 37588E-14 |
| NM_002160       | 3. 23592E-09 |
| NM_000594       | 0            |
| NM_007115       | 1. 12759E-07 |
| NM_147187       | 2. 22045E-16 |
| NM_003841       | 5. 63993E-14 |
| NM_001065       | 0            |
| NM_022144       | 4. 60021E-10 |
| NM_006114       | 3. 33067E-16 |
| Z36778          | 0            |
| NM_018643       | 0            |
| NM_174892       | 6. 30344E-05 |
| NM_025195       | 0            |
| NM_021158       | 0            |
| NM_178125       | 3. 14193E-14 |
| NM_005725       | 1. 44329E-15 |
| NM_133378       | 7. 73825E-14 |
| NM_006086       | 1. 79967E-13 |
| NM_006472       | 1. 82632E-13 |
| NM_003330       | 0            |
| NM_018003       | 0            |
| Conti g47339_RC | 0            |
| NM_012474       | 0            |
| NM_181597       | 4. 44089E-16 |
| NM_031471       | 4. 59628E-11 |
| Conti g42760_RC | 0            |
| NM_025090       | 0            |
| NM_003370       | 0            |
| NM_000376       | 0            |
| NM_052958       | 3. 77476E-15 |
| NM_004665       | 1. 11022E-15 |
| NM_018399       | 3. 75133E-09 |
| NM_000377       | 5. 25637E-08 |
| NM_003391       | 4. 01482E-06 |
| NM_006691       | 1. 44174E-12 |
| NM_006006       | 3. 33067E-16 |
| Conti g43253_RC | 1. 06398E-10 |
| NM_032772       | 3. 88967E-12 |
| NM_015461       | 1. 86517E-14 |
| Conti g2728_RC  | 1. 38457E-08 |
| Conti g51292_RC | 0            |
| Conti g31872_RC | 2. 65277E-09 |
| Conti g21997_RC | 0            |
| Conti g43708_RC | 1. 69644E-11 |
| Conti g13480_RC | 0            |
| Conti g47512_RC | 0            |

|                 |              |
|-----------------|--------------|
| Conti g50728_RC | 7. 74316E-09 |
| Conti g37690_RC | 1. 11428E-07 |
| Conti g26835_RC | 2. 35026E-11 |
| Conti g35400_RC | 0            |
| Conti g23085_RC | 0            |
| Conti g48806_RC | 0            |
| Conti g32336_RC | 9. 66181E-05 |
| Conti g40785_RC | 0            |
| Conti g23198_RC | 0            |
| Conti g22534_RC | 4. 68815E-09 |
| Conti g36902_RC | 0            |
| Conti g35897_RC | 0            |
| Conti g24282_RC | 1. 74422E-11 |
| Conti g28286_RC | 0            |
| AL080082        | 1. 48826E-07 |
| AK000802        | 0            |
| AL049337        | 8. 88178E-16 |
| Conti g48076_RC | 1. 40155E-12 |
| AI 401061_RC    | 0            |
| Conti g37538_RC | 1. 54168E-08 |
| Conti g36931_RC | 6. 66134E-16 |
