# Supplementary material for: Diurnal variation of the human adipose transcriptome and the link to metabolic disease
Source: PubMed Central journal article supplement (PMC2647943; doi:10.1186/1755-8794-2-7), 2009-02-09
Supplement: 1755-8794-2-7-S6.pdf [file 1755-8794-2-7-S6.pdf]

| Transcript     | Correlation to Per1 |
|----------------|---------------------|
| NM_023037      | 0.408083636         |
| AK001838       | -0.572535531        |
| NM_020772      | -0.741224811        |
| NM_153332      | -0.562009813        |
| NM_017436      | -0.444963267        |
| NM_004920      | -0.493418772        |
| NM_080282      | 0.542455342         |
| NM_001089      | 0.410605513         |
| NM_172346      | 0.556198643         |
| NM_019625      | 0.539509281         |
| NM_033450      | 0.545205097         |
| NM_000392      | 0.647959395         |
| NM_002940      | -0.687542895        |
| NM_001090      | -0.550194366        |
| NM_016818      | -0.715391501        |
| NM_152924      | -0.429498833        |
| NM_005157      | -0.487207421        |
| Contig56303_RC | -0.637996405        |
| NM_005158      | -0.638564934        |
| NM_013375      | -0.550926694        |
| NM_145804      | -0.422543399        |
| NM_024722      | 0.441745917         |
| NM_020039      | 0.452675887         |
| NM_003500      | 0.483524968         |
| NM_004457      | -0.477269981        |
| NM_004458      | -0.588761821        |
| NM_022977      | -0.643448221        |
| NM_001101      | -0.469445348        |
| NM_001614      | -0.507202692        |
| NM_005721      | -0.468229964        |
| NM_004302      | -0.479185327        |
| NM_001616      | -0.474187583        |
| NM_001106      | 0.520197712         |
| NM_001107      | 0.410242348         |
| NM_014064      | -0.514674581        |
| NM_033274      | -0.525316499        |
| NM_001109      | -0.424778254        |
| NM_006988      | -0.560592308        |
| NM_139025      | 0.471990666         |
| NM_014243      | -0.498874437        |
| NM_020249      | -0.662287873        |
| NM_182920      | -0.715371066        |
| NM_015834      | 0.456774569         |
| NM_014190      | 0.475383084         |
| NM_016824      | 0.414863586         |
| NM_001122      | -0.427430384        |
| NM_001124      | -0.636740791        |
| NM_017825      | -0.670133272        |
| NM_032264      | 0.433668706         |
| AF075057       | 0.567318962         |
| AF085900       | 0.451565889         |
| AF086149       | -0.625864437        |
| AF086164       | -0.487396735        |
| AF086261       | 0.545757588         |
| AF147300       | -0.46469556         |
| AF147344       | 0.545193744         |
| AF333388       | -0.514837058        |
| NM_024524      | -0.66004679         |
| NM_004835      | 0.478671944         |
| NM_152392      | 0.440900729         |
| AK000839       | 0.545122776         |
| AK001060       | 0.626331216         |
| AK001139       | 0.475750391         |
| AK001808       | 0.512523569         |

|                 |               |
|-----------------|---------------|
| AK021439        | 0. 565068999  |
| AK022092        | 0. 529185691  |
| AK022095        | 0. 420782124  |
| AK022482        | 0. 476637944  |
| AK022635        | 0. 410038401  |
| AK023526        | 0. 668757202  |
| AK023565        | 0. 413538029  |
| AK024118        | 0. 458225623  |
| AK024385        | -0. 530457435 |
| AK024545        | 0. 432064648  |
| AK024944        | -0. 545030888 |
| AK025246        | 0. 407586785  |
| AK054959        | 0. 645670054  |
| AK054971        | 0. 551594322  |
| AK054990        | 0. 590649794  |
| AK055014        | 0. 50897941   |
| AK055553        | 0. 484850285  |
| AK056146        | 0. 517345555  |
| AK056228        | 0. 725185992  |
| AK057578        | 0. 663245322  |
| AK057759        | 0. 567113221  |
| AK057835        | 0. 424980379  |
| NM_005858       | -0. 45565019  |
| AL050004        | -0. 430480502 |
| AL512701        | 0. 463551773  |
| NM_000693       | -0. 464299644 |
| NM_000034       | 0. 624380933  |
| NM_024105       | 0. 428294593  |
| NM_033087       | -0. 54338641  |
| NM_006020       | -0. 625347599 |
| Conti g47930_RC | 0. 411449133  |
| NM_173511       | 0. 432930047  |
| NM_001634       | -0. 742481164 |
| NM_020547       | 0. 415039758  |
| NM_001145       | 0. 427289974  |
| NM_001146       | 0. 412063819  |
| NM_001147       | -0. 447997647 |
| NM_139314       | -0. 460335975 |
| NM_024668       | -0. 545323376 |
| NM_032217       | -0. 430479796 |
| NM_144994       | 0. 581840292  |
| NM_173505       | 0. 461462258  |
| NM_001128       | -0. 446110966 |
| NM_001640       | 0. 502661069  |
| NM_014481       | -0. 465739977 |
| NM_030803       | -0. 650605555 |
| NM_017413       | -0. 499122164 |
| NM_145699       | -0. 484246171 |
| NM_145637       | -0. 450199363 |
| NM_030882       | -0. 45963231  |
| NM_020979       | -0. 616991412 |
| NM_001657       | -0. 558281009 |
| NM_021069       | 0. 651349009  |
| NM_004308       | 0. 41341266   |
| AF038193        | 0. 496222136  |
| NM_178815       | -0. 640614998 |
| NM_030978       | -0. 623465778 |
| NM_001670       | 0. 430595145  |
| Conti g44538_RC | 0. 494654082  |
| NM_017873       | -0. 407857391 |
| NM_024708       | -0. 442984219 |
| NM_024087       | 0. 440045877  |
| NM_006716       | -0. 472894767 |
| NM_133436       | -0. 574865221 |
| NM_018188       | -0. 459521008 |

|                 |               |
|-----------------|---------------|
| NM_006885       | 0. 44393629   |
| NM_004024       | -0. 643642701 |
| NM_001674       | -0. 663444761 |
| NM_020749       | 0. 507874933  |
| NM_032827       | 0. 625865117  |
| NM_001679       | -0. 577871342 |
| NM_170665       | -0. 651066602 |
| NM_012463       | -0. 49575884  |
| NM_001693       | -0. 58180365  |
| NM_144583       | 0. 578070044  |
| NM_004888       | -0. 502543081 |
| AK057452        | 0. 407958146  |
| NM_178190       | 0. 536435044  |
| NM_021732       | 0. 474175415  |
| NM_000054       | 0. 464957941  |
| NM_181050       | -0. 430538047 |
| NM_001699       | 0. 43923201   |
| NM_033027       | -0. 538339129 |
| AB029041        | 0. 531865721  |
| NM_003782       | 0. 400501073  |
| NM_006577       | -0. 427196652 |
| NM_032047       | -0. 571614764 |
| NM_003779       | -0. 691083441 |
| NM_004776       | -0. 779950489 |
| NM_001186       | -0. 474988707 |
| NM_004281       | -0. 685690364 |
| NM_004873       | -0. 411038555 |
| NM_014952       | -0. 452487847 |
| NM_003933       | 0. 542245983  |
| NM_006317       | -0. 487959344 |
| NM_033177       | 0. 480302229  |
| NM_025256       | 0. 525604425  |
| NM_006399       | -0. 627962125 |
| NM_013448       | -0. 534874338 |
| NM_182648       | -0. 671769381 |
| NM_024649       | 0. 447143766  |
| NM_020235       | 0. 453894783  |
| NM_021948       | 0. 449485956  |
| NM_014567       | -0. 558574554 |
| NM_078468       | -0. 524006079 |
| NM_005178       | -0. 71914227  |
| Conti g53619_RC | -0. 500276583 |
| NM_004326       | 0. 47750196   |
| NM_000710       | -0. 405160243 |
| NM_000623       | -0. 425705032 |
| NM_005434       | -0. 430600004 |
| NM_001195       | 0. 533157932  |
| NM_003670       | -0. 584298276 |
| Conti g26622_RC | -0. 486338675 |
| NM_139346       | 0. 408342147  |
| NM_016077       | -0. 793207875 |
| NM_018455       | -0. 521378142 |
| AL133599        | 0. 476644712  |
| NM_033254       | 0. 443974424  |
| NM_018321       | -0. 719287293 |
| NM_015399       | -0. 45574617  |
| NM_017942       | -0. 498334324 |
| NM_144653       | -0. 669097755 |
| NM_017797       | 0. 456757082  |
| NM_000060       | 0. 485368706  |
| NM_007048       | 0. 564376828  |
| AK056264        | -0. 572678775 |
| NM_004053       | -0. 765570326 |
| NM_007021       | -0. 411996092 |
| NM_153244       | -0. 537782559 |

|                 |              |
|-----------------|--------------|
| NM_022451       | -0.638860168 |
| NM_024834       | -0.54453213  |
| NM_032804       | -0.652225115 |
| NM_032709       | 0.415052058  |
| NM_018464       | -0.549413208 |
| AL080114        | 0.470220401  |
| NM_020644       | -0.584226137 |
| NM_021238       | -0.457799365 |
| AL122049        | -0.537503808 |
| NM_030809       | -0.615068784 |
| NM_020374       | -0.505510327 |
| AK000954        | -0.432049754 |
| NM_025113       | -0.427803766 |
| Conti g37037_RC | -0.672162814 |
| NM_032859       | -0.432854633 |
| Conti g3612_RC  | -0.42612934  |
| NM_018139       | -0.560794605 |
| NM_018453       | 0.430705039  |
| NM_020215       | 0.477098947  |
| NM_022067       | 0.528933207  |
| NM_024558       | -0.408874163 |
| NM_024644       | -0.54476189  |
| NM_152330       | -0.457815197 |
| NM_144578       | -0.533070916 |
| AK000671        | 0.476671033  |
| NM_021944       | 0.685065611  |
| NM_017815       | 0.498039551  |
| NM_030630       | 0.658941701  |
| NM_152260       | -0.427511987 |
| NM_152352       | -0.677484688 |
| NM_024805       | 0.483956027  |
| NM_013326       | -0.409875896 |
| NM_032245       | -0.633493202 |
| NM_152474       | 0.40794599   |
| NM_030806       | 0.480206755  |
| NM_016183       | -0.492541111 |
| NM_024319       | 0.407922056  |
| NM_001212       | -0.507224206 |
| NM_012072       | -0.40060868  |
| NM_030945       | 0.50333805   |
| NM_031911       | 0.407384604  |
| NM_080821       | 0.439226235  |
| NM_080725       | -0.481496014 |
| NM_152667       | -0.576019624 |
| NM_152302       | -0.634530857 |
| NM_018270       | -0.419448141 |
| NM_017798       | -0.651164216 |
| NM_018257       | 0.401952218  |
| NM_015511       | -0.437850514 |
| NM_032957       | -0.507804324 |
| NM_018354       | 0.470507343  |
| NM_178472       | -0.505517775 |
| NM_016649       | -0.636828699 |
| NM_032653       | 0.476856191  |
| NM_017438       | 0.42917489   |
| NM_178817       | 0.448756027  |
| NM_058187       | -0.521749361 |
| NM_144629       | 0.489143967  |
| NM_138611       | -0.591080757 |
| NM_022912       | 0.549072493  |
| NM_015680       | 0.517760171  |
| NM_017546       | -0.529821287 |
| NM_005768       | -0.471007699 |
| NM_000592       | -0.637138318 |
| NM_016348       | 0.621257206  |

|                 |               |
|-----------------|---------------|
| NM_015388       | 0. 467984265  |
| NM_005452       | -0. 436060639 |
| NM_033069       | -0. 401697207 |
| NM_031452       | -0. 41823432  |
| NM_145316       | -0. 446638584 |
| Conti g57908_RC | -0. 474225708 |
| NM_153362       | 0. 40916696   |
| NM_019052       | 0. 415539006  |
| NM_030651       | 0. 511806088  |
| NM_014165       | -0. 533633393 |
| NM_018247       | -0. 536167613 |
| NM_138459       | -0. 481770661 |
| AK002014        | 0. 440482052  |
| NM_015439       | 0. 414760112  |
| Conti g55114_RC | 0. 414431859  |
| NM_032860       | -0. 447472996 |
| NM_024051       | -0. 613930252 |
| NM_138446       | -0. 440581682 |
| AK024443        | 0. 444210362  |
| NM_022755       | -0. 674498493 |
| NM_016446       | 0. 404075461  |
| NM_144966       | 0. 454344225  |
| AK000001        | 0. 49296992   |
| Conti g49409    | -0. 497021687 |
| NM_031426       | 0. 516117885  |
| NM_006336       | 0. 485724798  |
| Conti g47220    | -0. 553375151 |
| Conti g6610_RC  | -0. 547810843 |
| X02330          | -0. 543015327 |
| NM_005795       | 0. 449938095  |
| NM_003656       | 0. 467994239  |
| Conti g20908_RC | 0. 471630481  |
| NM_001222       | 0. 432156672  |
| NM_005186       | 0. 508787892  |
| NM_173087       | 0. 491749956  |
| NM_004055       | 0. 418085755  |
| NM_080590       | 0. 466775361  |
| NM_014550       | 0. 465175689  |
| NM_022162       | -0. 422486883 |
| NM_139273       | -0. 428051562 |
| NM_032976       | 0. 492821717  |
| NM_001225       | -0. 531506337 |
| NM_004347       | -0. 431433331 |
| NM_001226       | 0. 47284778   |
| NM_033338       | -0. 513468187 |
| NM_004349       | 0. 430434702  |
| NM_005187       | 0. 433067243  |
| NM_001755       | -0. 521590176 |
| NM_182511       | 0. 433045581  |
| NM_000071       | -0. 579025005 |
| NM_175709       | 0. 498833179  |
| NM_004059       | 0. 639755568  |
| NM_002986       | -0. 519773784 |
| NM_002982       | -0. 699940386 |
| NM_002983       | -0. 475416346 |
| NM_006273       | -0. 60022073  |
| NM_005623       | -0. 743610545 |
| AK000799        | -0. 536610237 |
| NM_020307       | -0. 445399845 |
| NM_001295       | -0. 528526008 |
| NM_003965       | -0. 698844558 |
| NM_006431       | -0. 657390283 |
| NM_005998       | -0. 411884015 |
| NM_012073       | -0. 402514069 |
| NM_000591       | -0. 425410289 |

|                 |              |
|-----------------|--------------|
| NM_001766       | -0.426051183 |
| NM_001773       | 0.613890664  |
| NM_000611       | -0.471204566 |
| NM_004233       | -0.445478299 |
| NM_002414       | 0.476463834  |
| Conti g28947_RC | -0.421168821 |
| NM_006779       | -0.598179313 |
| NM_001254       | -0.546127779 |
| NM_003503       | -0.575257576 |
| NM_022842       | -0.540960913 |
| NM_052827       | -0.58365631  |
| NM_000389       | -0.703362004 |
| NM_000076       | 0.476409527  |
| M63256          | -0.496652897 |
| NM_021146       | 0.436767402  |
| NM_001712       | -0.722721272 |
| NM_005194       | -0.47727335  |
| NM_005195       | -0.553413433 |
| NM_001806       | -0.499360327 |
| NM_005760       | -0.576826653 |
| NM_001408       | 0.414784574  |
| NM_015230       | -0.46974006  |
| NM_007018       | 0.477622008  |
| NM_015939       | -0.644038234 |
| NM_016052       | -0.675640652 |
| NM_015942       | -0.544184968 |
| NM_016101       | -0.695357405 |
| NM_016140       | 0.479203735  |
| NM_015964       | 0.475064387  |
| NM_016001       | -0.715523382 |
| NM_032205       | -0.438460021 |
| NM_003956       | -0.714677449 |
| NM_001269       | -0.558699186 |
| NM_001270       | -0.548405876 |
| NM_006387       | -0.490338117 |
| NM_018223       | -0.426331618 |
| NM_012124       | -0.643351117 |
| NM_015424       | -0.728458653 |
| NM_004854       | -0.594196485 |
| NM_004267       | -0.419213291 |
| NM_014918       | -0.659552951 |
| NM_001278       | -0.491705372 |
| NM_032830       | -0.650905586 |
| NM_016274       | -0.464384762 |
| NM_138410       | -0.533250854 |
| NM_013246       | -0.568775551 |
| NM_005602       | 0.400358232  |
| NM_001305       | 0.433380539  |
| NM_013252       | -0.44943922  |
| NM_001292       | 0.418692535  |
| NM_014944       | 0.644797298  |
| NM_030629       | -0.416006964 |
| NM_020311       | -0.516497938 |
| NM_032869       | -0.459846957 |
| NM_014865       | 0.511280213  |
| Conti g27972_RC | 0.477406511  |
| NM_018366       | -0.615875587 |
| NM_016083       | 0.476757689  |
| NM_015386       | 0.552576797  |
| NM_032382       | -0.52170907  |
| NM_030582       | 0.483352073  |
| NM_173465       | 0.466789012  |
| NM_152890       | 0.47940872   |
| NM_032161       | -0.504572632 |
| NM_080541       | 0.674309954  |

|                 |               |
|-----------------|---------------|
| AK000009        | 0. 409600179  |
| NM_000754       | 0. 406415683  |
| NM_007310       | 0. 403515992  |
| NM_022730       | 0. 460752546  |
| NM_014325       | -0. 492729909 |
| NM_001302       | 0. 470905897  |
| NM_030627       | -0. 479176962 |
| NM_152727       | 0. 407087409  |
| NM_020939       | -0. 483735388 |
| NM_153634       | -0. 557289995 |
| NM_006693       | -0. 454631637 |
| NM_007007       | -0. 512432559 |
| Conti g41560_RC | 0. 497650778  |
| NM_152359       | 0. 465714427  |
| NM_130898       | 0. 497453603  |
| NM_001881       | -0. 582342948 |
| NM_016507       | -0. 46957058  |
| NM_014675       | 0. 513442812  |
| NM_004269       | -0. 430569136 |
| NM_145311       | 0. 514582024  |
| NM_015989       | 0. 473156198  |
| NM_013434       | 0. 426937732  |
| NM_000758       | -0. 54308107  |
| NM_001893       | -0. 464888375 |
| Conti g54259_RC | -0. 469524622 |
| NM_004385       | -0. 428459026 |
| NM_175856       | -0. 403701555 |
| NM_015235       | -0. 61581253  |
| NM_024792       | -0. 693563744 |
| NM_020428       | 0. 468389031  |
| NM_001905       | -0. 781112654 |
| NM_001912       | -0. 732336237 |
| NM_003592       | -0. 423386312 |
| NM_014780       | 0. 557051459  |
| NM_181500       | 0. 42149008   |
| NM_001511       | -0. 694697769 |
| NM_004887       | 0. 46620769   |
| NM_002089       | -0. 724571729 |
| NM_005491       | -0. 412472213 |
| NM_025212       | 0. 51090276   |
| NM_000103       | -0. 45159435  |
| NM_000104       | -0. 484379201 |
| NM_023944       | 0. 547573141  |
| NM_000786       | -0. 503588161 |
| NM_001554       | -0. 719990822 |
| NM_015345       | 0. 460931373  |
| Conti g2930_RC  | -0. 591141312 |
| NM_001343       | -0. 458984615 |
| AF318336        | 0. 523281186  |
| NM_000574       | -0. 489352396 |
| NM_020188       | -0. 430978561 |
| Conti g8156_RC  | 0. 407595692  |
| NM_032636       | 0. 608918455  |
| NM_012137       | -0. 574381037 |
| NM_000107       | 0. 536361791  |
| NM_004083       | -0. 446201074 |
| NM_019058       | 0. 55373092   |
| NM_004398       | -0. 619837076 |
| NM_006773       | -0. 550868474 |
| NM_007204       | -0. 413423181 |
| NM_004728       | -0. 732162118 |
| NM_012141       | -0. 497353112 |
| NM_018380       | -0. 59377262  |
| NM_022779       | -0. 683949303 |
| NM_005804       | -0. 669890996 |

|                 |              |
|-----------------|--------------|
| NM_001356       | -0.494022821 |
| NM_016355       | -0.506907444 |
| NM_014740       | -0.640784665 |
| AL133585        | -0.467912204 |
| NM_007010       | -0.424351582 |
| NM_152300       | -0.428653773 |
| NM_032998       | -0.455879026 |
| NM_022783       | 0.459881089  |
| Conti g569_RC   | -0.579793846 |
| L77565          | -0.592403705 |
| NM_178009       | -0.450687069 |
| NM_001358       | -0.460182881 |
| NM_014966       | -0.47943805  |
| Conti g53750_RC | -0.733045755 |
| NM_020162       | -0.564589367 |
| NM_032656       | -0.55000222  |
| NM_000398       | 0.421856951  |
| NM_007326       | -0.502101519 |
| NM_022345       | 0.582635083  |
| NM_018982       | -0.423041588 |
| NM_001363       | -0.538882642 |
| NM_031476       | -0.607630724 |
| NM_015426       | -0.603145612 |
| NM_030817       | -0.599259232 |
| NM_032254       | 0.520284222  |
| NM_015412       | -0.593980133 |
| NM_022742       | 0.523133228  |
| NM_015492       | -0.506971681 |
| NM_017606       | 0.467273262  |
| NM_152892       | -0.4495906   |
| NM_022778       | -0.6305304   |
| Conti g55334_RC | 0.561671146  |
| NM_020161       | -0.644681803 |
| NM_032018       | -0.505386415 |
| NM_015582       | 0.484675796  |
| NM_015459       | -0.4205897   |
| AF074987        | -0.538976471 |
| NM_015420       | -0.699940779 |
| AK025205        | 0.445216987  |
| Conti g25362_RC | -0.431434382 |
| NM_030797       | -0.456100101 |
| NM_015509       | -0.490964297 |
| NM_030923       | 0.465032413  |
| NM_015533       | 0.517409452  |
| NM_015462       | -0.558140403 |
| NM_015400       | -0.60833491  |
| Conti g2313_RC  | 0.401658048  |
| NM_177966       | -0.783726954 |
| NM_032297       | 0.524938767  |
| RSE_00000563272 | -0.430813068 |
| NM_152661       | 0.460249374  |
| NM_144996       | -0.423363278 |
| AK024495        | 0.432201377  |
| Conti g47102_RC | 0.570309067  |
| NM_178542       | 0.610513072  |
| AL390216        | 0.559030517  |
| NM_019100       | 0.409225844  |
| NM_001539       | -0.529768281 |
| NM_005740       | 0.467991672  |
| AF118274        | 0.672276662  |
| NM_139072       | 0.438140473  |
| NM_015569       | 0.508326125  |
| NM_005851       | 0.472055988  |
| NM_018431       | -0.583565646 |
| NM_001383       | -0.423672913 |



|                 |              |
|-----------------|--------------|
| NM_001384       | -0.66014761  |
| NM_001387       | 0.611885404  |
| Conti g54915_RC | 0.412030429  |
| AL137332        | -0.492099085 |
| NM_032581       | -0.561783665 |
| NM_014503       | -0.655516453 |
| NM_004414       | -0.649643471 |
| NM_003720       | -0.593264946 |
| NM_001945       | -0.603734837 |
| NM_020892       | -0.408761954 |
| NM_178502       | 0.490342177  |
| NM_004418       | -0.510933124 |
| NM_057158       | -0.651518839 |
| NM_001394       | -0.714714809 |
| NM_004419       | -0.51636988  |
| NM_001946       | -0.557353885 |
| NM_001949       | -0.440976394 |
| NM_001951       | -0.625510811 |
| NM_001952       | -0.519528911 |
| NM_016565       | -0.424083769 |
| Conti g37295_RC | -0.544677974 |
| NM_024007       | 0.446877243  |
| NM_024693       | 0.460741884  |
| NM_032411       | 0.503614231  |
| Conti g52405_RC | -0.564142239 |
| NM_001955       | 0.525696266  |
| NM_025202       | 0.443332372  |
| NM_024329       | -0.418184074 |
| NM_182685       | 0.45916936   |
| NM_025205       | -0.477039152 |
| NM_001964       | -0.729747691 |
| NM_000399       | -0.588143872 |
| NM_004430       | -0.683213829 |
| NM_006795       | -0.488147374 |
| Conti g176_RC   | -0.445334068 |
| NM_003758       | -0.438005445 |
| NM_003751       | -0.481162284 |
| NM_001416       | -0.625956096 |
| NM_001968       | -0.465709099 |
| NM_004846       | -0.402940557 |
| NM_018638       | -0.413824815 |
| NM_001421       | -0.410929453 |
| NM_005229       | -0.566914041 |
| NM_001973       | -0.439773091 |
| NM_012081       | -0.439352033 |
| NM_001423       | -0.409181858 |
| AL137578        | 0.462524398  |
| ENST00000238062 | -0.508530748 |
| ENST00000253016 | -0.578722776 |
| ENST00000266926 | -0.471535608 |
| ENST00000272235 | -0.43488439  |
| ENST00000274966 | -0.47731378  |
| ENST00000277872 | -0.484564969 |
| ENST00000278205 | -0.572973823 |
| ENST00000282037 | -0.580891983 |
| ENST00000299111 | -0.54812855  |
| Conti g30671_RC | 0.50396727   |
| NM_004431       | -0.488109447 |
| NM_001979       | 0.501766178  |
| NM_014597       | -0.525975546 |
| NM_000124       | 0.475229867  |
| NM_004451       | -0.482303118 |
| NM_004730       | -0.547961253 |
| NM_005239       | -0.457824723 |
| NM_001987       | -0.494432454 |

|                 |              |
|-----------------|--------------|
| NM_144765       | -0.509802723 |
| NM_005797       | -0.725967602 |
| NM_147127       | 0.426092111  |
| NM_015219       | 0.466961948  |
| NM_016042       | -0.726466551 |
| NM_019037       | -0.428194129 |
| NM_001991       | 0.716944028  |
| Conti g51006_RC | -0.625842852 |
| NM_145249       | 0.425646749  |
| NM_020223       | -0.542536158 |
| NM_022068       | 0.406415705  |
| NM_021922       | 0.505618765  |
| NM_004629       | 0.492743814  |
| NM_006567       | 0.41606513   |
| NM_004461       | -0.52600647  |
| NM_032145       | -0.494592604 |
| Conti g56270_RC | 0.463499175  |
| AK023391        | 0.415869976  |
| NM_058229       | 0.716990853  |
| NM_000566       | -0.432191386 |
| NM_004462       | 0.442190219  |
| NM_020482       | 0.494254946  |
| NM_014344       | -0.410540783 |
| NM_054014       | -0.62828171  |
| NM_182827       | 0.438347881  |
| NM_004118       | 0.428594499  |
| NM_031307       | -0.735408049 |
| NM_031904       | -0.571369603 |
| NM_052847       | 0.681859116  |
| NM_017991       | 0.431289884  |
| NM_017994       | -0.491335872 |
| NM_018035       | 0.4823576    |
| NM_018059       | 0.561942615  |
| NM_018066       | -0.539950287 |
| NM_018072       | -0.526868321 |
| NM_032239       | -0.643512486 |
| NM_019057       | 0.461693085  |
| NM_018089       | 0.582184177  |
| NM_018093       | -0.517475751 |
| NM_018130       | -0.599816418 |
| NM_018134       | 0.490979415  |
| NM_018138       | -0.658675011 |
| NM_024662       | -0.520336395 |
| NM_018233       | -0.454719685 |
| NM_018346       | -0.565165781 |
| NM_018370       | -0.476002603 |
| NM_018379       | 0.446472396  |
| NM_018390       | -0.401249466 |
| NM_024666       | -0.611124336 |
| NM_024748       | 0.598365653  |
| NM_024603       | 0.475908416  |
| NM_021934       | -0.656630881 |
| NM_024891       | 0.494578669  |
| NM_025155       | 0.458368906  |
| NM_023077       | -0.62529278  |
| NM_022767       | -0.765606971 |
| NM_032168       | -0.465860846 |
| NM_023074       | -0.466841701 |
| NM_024998       | -0.575635899 |
| NM_024855       | -0.462443914 |
| NM_024742       | -0.497196093 |
| Conti g58353_RC | -0.484355006 |
| NM_025000       | -0.409437728 |
| NM_021826       | -0.572577924 |
| NM_024853       | 0.416525217  |

|                 |               |
|-----------------|---------------|
| NM_025147       | -0. 556272129 |
| NM_024706       | -0. 457315248 |
| NM_024868       | 0. 410391266  |
| NM_024709       | 0. 594267837  |
| NM_024903       | 0. 523619377  |
| NM_025069       | -0. 509207991 |
| NM_024733       | 0. 418495091  |
| Conti g56160_RC | -0. 691811545 |
| NM_032849       | -0. 618116718 |
| NM_032284       | -0. 594311148 |
| NM_032866       | 0. 506792366  |
| NM_017622       | 0. 481229965  |
| NM_015590       | -0. 684006525 |
| NM_017733       | 0. 433423579  |
| NM_019027       | -0. 450135441 |
| NM_017755       | -0. 627419091 |
| NM_019005       | -0. 472291203 |
| NM_017776       | 0. 500020542  |
| NM_017777       | 0. 445505731  |
| NM_017782       | -0. 598081716 |
| NM_017837       | 0. 46235827   |
| NM_017841       | -0. 457489694 |
| NM_017860       | -0. 42190425  |
| NM_017866       | -0. 563830607 |
| NM_017888       | 0. 405280116  |
| NM_017908       | 0. 549807273  |
| NM_017916       | 0. 530176049  |
| Conti g49512_RC | 0. 419141522  |
| NM_017940       | 0. 430055331  |
| NM_017956       | -0. 43066137  |
| NM_017966       | -0. 50781726  |
| NM_024600       | 0. 591580949  |
| Conti g773      | -0. 63078491  |
| NM_024627       | -0. 482543235 |
| NM_024549       | 0. 536126102  |
| NM_024602       | 0. 500795209  |
| NM_025032       | 0. 406993627  |
| NM_024738       | -0. 497698211 |
| NM_021831       | 0. 424822923  |
| NM_023015       | 0. 538380761  |
| NM_032213       | 0. 455648859  |
| NM_024561       | -0. 51517209  |
| NM_024836       | -0. 595805157 |
| Conti g36364_RC | -0. 523224847 |
| NM_024717       | -0. 640770173 |
| NM_024697       | -0. 650130551 |
| NM_025140       | 0. 42748397   |
| NM_024785       | -0. 426267881 |
| NM_022074       | 0. 408219809  |
| NM_022837       | -0. 713682279 |
| NM_024636       | -0. 569984759 |
| NM_024616       | -0. 678025956 |
| NM_025079       | -0. 580879566 |
| NM_024530       | -0. 65141151  |
| NM_024766       | 0. 456798764  |
| Conti g23475_RC | -0. 556903619 |
| NM_024640       | -0. 649373037 |
| NM_182500       | 0. 436291123  |
| NM_152546       | -0. 626903026 |
| Conti g13706_RC | 0. 413230929  |
| NM_145018       | -0. 529139422 |
| NM_153008       | 0. 528930544  |
| NM_174950       | -0. 50765609  |
| NM_182573       | -0. 594272996 |
| NM_153014       | -0. 533442663 |

|                 |              |
|-----------------|--------------|
| NM_152461       | -0.565099744 |
| NM_144609       | -0.489440085 |
| NM_144726       | -0.424186338 |
| NM_144669       | -0.426507708 |
| NM_173795       | 0.4821064    |
| NM_152502       | 0.457817347  |
| Conti g43338_RC | 0.529681281  |
| NM_152440       | -0.521350029 |
| NM_152415       | -0.452319161 |
| NM_152500       | 0.507924341  |
| NM_175918       | 0.404417516  |
| NM_152608       | -0.598412795 |
| Conti g53242_RC | -0.537952977 |
| NM_175884       | -0.674470275 |
| NM_173622       | 0.454200985  |
| NM_152716       | -0.55862234  |
| Conti g48021_RC | -0.473631789 |
| NM_173507       | 0.408514624  |
| NM_152382       | -0.435746676 |
| NM_153261       | -0.40102247  |
| NM_153689       | -0.427056348 |
| NM_178519       | 0.421865825  |
| AF086471        | -0.454752726 |
| NM_152307       | -0.520317001 |
| NM_173677       | 0.424298483  |
| NM_152665       | -0.535837686 |
| NM_153690       | -0.491235858 |
| NM_175919       | 0.560113143  |
| NM_014053       | -0.492984468 |
| NM_022823       | -0.625131022 |
| NM_153756       | 0.609698218  |
| NM_002028       | 0.45291978   |
| NM_018416       | 0.513847306  |
| NM_004514       | -0.485233501 |
| NM_002029       | -0.464314526 |
| NM_181355       | 0.435452348  |
| NM_024919       | 0.453496926  |
| NM_174938       | 0.452848548  |
| NM_006653       | 0.49515164   |
| NM_015440       | -0.618660133 |
| U79260          | 0.464968684  |
| NM_003902       | -0.577282588 |
| NM_145059       | 0.468351678  |
| NM_006625       | -0.466485485 |
| NM_000148       | -0.414051922 |
| NM_022003       | 0.501652209  |
| NM_153047       | 0.600794888  |
| NM_031866       | -0.682132708 |
| NM_005754       | -0.468293002 |
| NM_006360       | -0.417719398 |
| NM_016654       | -0.410763067 |
| NM_002041       | -0.510224062 |
| NM_001924       | -0.430171021 |
| NM_015675       | -0.529235733 |
| NM_024637       | 0.756359221  |
| NM_000403       | -0.406972413 |
| NM_014863       | -0.489788384 |
| NM_015892       | -0.505747442 |
| NM_018590       | -0.41381506  |
| NM_020474       | -0.550344545 |
| NM_000155       | 0.665214126  |
| NM_147131       | 0.478703996  |
| NM_147132       | 0.463749787  |
| NM_032293       | 0.559492379  |
| NM_005512       | -0.450402059 |

|                 |               |
|-----------------|---------------|
| NM_002047       | -0. 547545938 |
| NM_175085       | -0. 497888251 |
| NM_005257       | -0. 597120882 |
| NM_002053       | -0. 43495804  |
| NM_024523       | -0. 509391321 |
| NM_000161       | -0. 532348417 |
| NM_001486       | -0. 610825972 |
| AI 559539_RC    | -0. 409586857 |
| NM_002061       | -0. 40973614  |
| NM_004864       | -0. 591712657 |
| NM_020634       | -0. 426475136 |
| NM_181702       | -0. 448933384 |
| NM_017655       | 0. 408301616  |
| NM_000165       | -0. 524113436 |
| Conti g40478_RC | -0. 546218935 |
| NM_020198       | -0. 520996249 |
| NM_000168       | 0. 4541127    |
| NM_002064       | -0. 451530289 |
| Conti g5961_RC  | 0. 409665568  |
| NM_006572       | -0. 444720349 |
| NM_053004       | -0. 494036933 |
| AK001469        | -0. 622191854 |
| NM_000825       | 0. 597253079  |
| NM_152742       | 0. 434815132  |
| NM_014879       | 0. 403237101  |
| NM_138445       | 0. 44197646   |
| Conti g45082_RC | -0. 650623592 |
| NM_153832       | 0. 427515109  |
| NM_001505       | 0. 53928016   |
| NM_005282       | -0. 621855399 |
| NM_005304       | -0. 501956451 |
| NM_006056       | 0. 408070071  |
| NM_032554       | 0. 452293079  |
| NM_018653       | 0. 401454851  |
| NM_013372       | -0. 425974097 |
| NM_012203       | 0. 44825581   |
| NM_133445       | 0. 463409316  |
| NM_025196       | -0. 729407107 |
| NM_152407       | -0. 611236299 |
| NM_031485       | -0. 525886202 |
| NM_173849       | 0. 542890999  |
| NM_002093       | -0. 535776296 |
| NM_000177       | 0. 593724122  |
| NM_000178       | 0. 408936054  |
| NM_015917       | 0. 418219157  |
| NM_004128       | -0. 573052477 |
| NM_012086       | 0. 447998874  |
| NM_012341       | -0. 764061198 |
| NM_005317       | 0. 489069429  |
| NM_018267       | 0. 462429993  |
| NM_002105       | -0. 662932661 |
| NM_005324       | -0. 441745045 |
| NM_021175       | -0. 40460494  |
| NM_003947       | -0. 433637877 |
| NM_021817       | 0. 498441516  |
| NM_178232       | -0. 514285312 |
| NM_001523       | -0. 639759507 |
| NM_012257       | 0. 532456438  |
| NM_018684       | 0. 56477739   |
| NM_053005       | 0. 449968627  |
| NM_015416       | 0. 487725844  |
| AB040968        | 0. 496189888  |
| NM_002111       | 0. 457866443  |
| NM_006037       | -0. 659478185 |
| NM_139205       | 0. 589403887  |

|                 |               |
|-----------------|---------------|
| NM_005474       | 0. 544076018  |
| NM_016073       | -0. 416597973 |
| NM_006831       | -0. 685240964 |
| NM_014877       | 0. 499305124  |
| NM_138737       | 0. 413481336  |
| NM_139004       | 0. 475817174  |
| NM_006553       | -0. 468437288 |
| NM_000601       | -0. 449963237 |
| NM_016258       | -0. 409185275 |
| NM_002729       | -0. 514050738 |
| NM_001529       | -0. 56607162  |
| NM_153236       | 0. 411327234  |
| Conti g40128_RC | -0. 54793646  |
| NM_001530       | -0. 648588522 |
| NM_181054       | -0. 686727897 |
| NM_022462       | 0. 644912629  |
| AB014555        | 0. 464086484  |
| Conti g37871_RC | 0. 448345413  |
| NM_021958       | -0. 49856785  |
| NM_145899       | -0. 457004817 |
| NM_002129       | 0. 440319669  |
| AF131827        | 0. 577594449  |
| NM_000859       | -0. 450208324 |
| NM_002130       | -0. 62282955  |
| NM_006353       | -0. 548075506 |
| NM_002133       | -0. 718727192 |
| NM_004499       | -0. 56120962  |
| NM_031266       | -0. 609194651 |
| Conti g36638_RC | 0. 491711457  |
| NM_004966       | -0. 688207372 |
| NM_019597       | -0. 41576886  |
| NM_005826       | -0. 403277506 |
| NM_004272       | -0. 676654407 |
| NM_015438       | 0. 438146884  |
| NM_000522       | 0. 468581423  |
| NM_153631       | 0. 519531084  |
| NM_004503       | 0. 406464123  |
| NM_006897       | 0. 443949202  |
| NM_000194       | -0. 581611724 |
| NM_000861       | -0. 450850988 |
| Conti g53965_RC | -0. 520429139 |
| Conti g55193_RC | -0. 624406974 |
| AJ251708        | 0. 463086491  |
| NM_014473       | -0. 648387378 |
| NM_000196       | 0. 439336419  |
| NM_014234       | 0. 46786591   |
| NM_016299       | -0. 415462834 |
| NM_005347       | -0. 471631317 |
| NM_004134       | -0. 486500503 |
| NM_016387       | -0. 408177843 |
| NM_016391       | -0. 752133895 |
| NM_016399       | -0. 526883669 |
| NM_014173       | 0. 4577436    |
| NM_002156       | -0. 479381752 |
| NM_002157       | -0. 439272779 |
| NM_006644       | -0. 696586095 |
| NM_013300       | -0. 510627652 |
| AF086402        | -0. 585636482 |
| NM_013285       | -0. 606626933 |
| AJ276240        | 0. 452524235  |
| AJ227898        | -0. 525615882 |
| NM_152553       | -0. 415048936 |
| NM_153341       | -0. 541834801 |
| NM_170705       | 0. 429000099  |
| M96843          | -0. 449562011 |

Conti g47495\_RC -0. 582207737  
NM\_015384 -0. 416179809  
NM\_004907 -0. 615234747  
NM\_003897 -0. 665216458  
NM\_016545 -0. 508919573  
NM\_005531 -0. 717841575  
NM\_001551 0. 458814921  
NM\_000597 0. 478612851  
L27560 0. 618742436  
NM\_016291 0. 644732296  
NM\_000572 -0. 496322731  
NM\_000882 -0. 547306019  
NM\_002188 -0. 625989333  
NM\_000585 -0. 431968589  
NM\_172217 0. 629974735  
NM\_003855 -0. 542090148  
NM\_000576 -0. 635282487  
NM\_000877 -0. 513022672  
NM\_000418 -0. 617285508  
NM\_000600 -0. 816483765  
NM\_000584 -0. 604047649  
NM\_130759 0. 442216878  
NM\_016162 0. 708234653  
NM\_002193 -0. 470969233  
NM\_005542 -0. 586921519  
NM\_002198 -0. 535592841  
NM\_002201 -0. 676913124  
NM\_005545 0. 459911985  
NM\_002205 -0. 539779194  
NM\_000887 -0. 440116044  
NM\_004867 0. 401197493  
NM\_030926 0. 523739624  
NM\_006469 -0. 401951285  
Conti g55048\_RC 0. 465577964  
NM\_004653 0. 542556737  
NM\_033626 0. 471581818  
NM\_016604 0. 440665388  
AB002344 -0. 528231874  
NM\_020655 0. 508909544  
NM\_006303 -0. 607732933  
NM\_002229 -0. 657514554  
NM\_030929 0. 508155603  
AL117562 -0. 506965394  
AB067508 -0. 439071423  
NM\_172160 0. 42144849  
NM\_004979 0. 408742571  
NM\_170736 -0. 444168442  
NM\_002243 -0. 584085603  
NM\_000891 -0. 507445219  
NM\_003740 -0. 542735157  
NM\_014407 0. 515357459  
Conti g41578\_RC 0. 426204262  
NM\_031954 -0. 445538556  
NM\_138444 -0. 586718127  
NM\_002253 -0. 423680628  
NM\_006558 -0. 571300121  
D26488 -0. 644493849  
NM\_014878 -0. 569775003  
NM\_014777 -0. 644770458  
NM\_014661 0. 575589617  
NM\_014773 0. 422957102  
NM\_014738 0. 536384631  
D86985 -0. 50055341  
NM\_014734 -0. 492423906  
D87470 0. 521697376

|                 |              |
|-----------------|--------------|
| NM_015324       | -0.467947563 |
| AB007915        | -0.533465875 |
| NM_024547       | 0.420981482  |
| NM_014870       | 0.548299581  |
| NM_015176       | -0.526963198 |
| AB007962        | -0.596625496 |
| AB011115        | 0.545344297  |
| NM_014662       | 0.435494083  |
| NM_015179       | -0.648346249 |
| NM_014719       | 0.546677096  |
| AB018345        | -0.510856436 |
| NM_014924       | 0.471309267  |
| NM_014963       | -0.690312643 |
| NM_014929       | -0.523808408 |
| NM_025164       | -0.464269281 |
| NM_014925       | 0.48908755   |
| AB028949        | -0.472372153 |
| NM_014909       | 0.428778803  |
| NM_015281       | 0.425310073  |
| NM_015079       | 0.518083049  |
| AB029030        | 0.418285606  |
| AB032996        | -0.432740817 |
| AL137567        | 0.601882777  |
| NM_017963       | -0.427479229 |
| NM_025081       | 0.43877554   |
| AB037815        | 0.450617665  |
| NM_020817       | 0.44871434   |
| NM_017780       | -0.511244942 |
| NM_020832       | 0.417288362  |
| AB040883        | -0.50723923  |
| Conti g57398_RC | -0.593350192 |
| Conti g52095_RC | -0.433095156 |
| AB040938        | 0.528517865  |
| Conti g49270_RC | -0.679584131 |
| AB046843        | 0.430165481  |
| AB051458        | 0.546400129  |
| AB051470        | 0.570745507  |
| Conti g48436_RC | -0.509962663 |
| Conti g43542_RC | -0.413698961 |
| AB051511        | -0.507245743 |
| NM_024935       | 0.405570606  |
| NM_017794       | 0.608747207  |
| AB058729        | -0.427309078 |
| AB058765        | 0.49779326   |
| NM_052913       | -0.515251331 |
| NM_032550       | 0.548567251  |
| Conti g2263_RC  | -0.507504849 |
| NM_032873       | -0.557966155 |
| Conti g924_RC   | -0.583734415 |
| NM_007250       | 0.436763148  |
| NM_007246       | -0.428074274 |
| NM_017415       | 0.4464178    |
| NM_130446       | -0.592742225 |
| NM_022046       | -0.415310495 |
| NM_002266       | -0.663961644 |
| NM_032107       | 0.566840811  |
| NM_015478       | 0.404944361  |
| NM_032857       | -0.544131637 |
| NM_025144       | -0.455712262 |
| NM_005559       | -0.534935738 |
| NM_000227       | 0.431981986  |
| NM_018407       | -0.509213829 |
| NM_002296       | -0.447360503 |
| NM_014793       | -0.654677218 |
| NM_005565       | -0.515224521 |



|                 |               |
|-----------------|---------------|
| NM_000527       | -0. 704968202 |
| AK026321        | 0. 411318303  |
| NM_139284       | 0. 420457765  |
| NM_024119       | 0. 431823773  |
| NM_006893       | 0. 515322802  |
| NM_005779       | -0. 476054249 |
| NM_002309       | -0. 473408353 |
| NM_006864       | -0. 477839136 |
| NM_016733       | -0. 504587806 |
| NM_005569       | -0. 528961031 |
| NM_018362       | -0. 565334891 |
| NM_006033       | -0. 571903597 |
| NM_021250       | -0. 434670406 |
| NM_004862       | -0. 565118602 |
| NM_019081       | 0. 442619306  |
| NM_030805       | 0. 460356653  |
| NM_032737       | -0. 544869934 |
| NM_002315       | 0. 586332906  |
| NM_005475       | -0. 423112435 |
| NM_138422       | -0. 528662348 |
| AL050205        | -0. 510592557 |
| NM_052879       | -0. 725235387 |
| Conti g63304    | -0. 635023103 |
| BC013767        | -0. 60021415  |
| Conti g38772_RC | 0. 413561626  |
| BC017488        | 0. 595055694  |
| NM_145254       | -0. 541714518 |
| NM_182752       | 0. 435088446  |
| NM_139016       | 0. 419942912  |
| NM_152994       | 0. 575411525  |
| NM_138285       | -0. 695680936 |
| NM_178833       | -0. 643004125 |
| BC016683        | -0. 429915618 |
| Conti g1815_RC  | 0. 415327066  |
| NM_138478       | 0. 509359676  |
| NM_181710       | 0. 401994779  |
| NM_144697       | 0. 797578963  |
| NM_175853       | 0. 405022169  |
| NM_178835       | 0. 440926969  |
| NM_145282       | 0. 414232292  |
| AI 339981_RC    | -0. 494332672 |
| NM_138491       | 0. 515874229  |
| Conti g58107_RC | 0. 549026004  |
| Conti g40903_RC | -0. 633521358 |
| NM_174918       | -0. 551168882 |
| AL110170        | -0. 408764898 |
| NM_145309       | 0. 412338762  |
| Conti g55984_RC | -0. 481748555 |
| NM_181719       | 0. 452576926  |
| NM_182556       | 0. 533923613  |
| NM_174940       | 0. 433316713  |
| NM_175897       | 0. 428267984  |
| NM_175898       | -0. 475373118 |
| Conti g53406_RC | -0. 647114643 |
| Conti g32072_RC | -0. 432308678 |
| RSE_00000601195 | 0. 565334274  |
| Conti g63026    | -0. 624090819 |
| AW673036_RC     | -0. 532722168 |
| Conti g15283_RC | 0. 522030958  |
| NM_178172       | 0. 493375533  |
| NM_178538       | 0. 536815142  |
| NM_178564       | 0. 428003568  |
| Conti g6498     | -0. 625286781 |
| ENST00000295549 | 0. 53097474   |
| Conti g4595     | -0. 715510889 |

|                 |               |
|-----------------|---------------|
| Conti g44964_RC | -0. 581685434 |
| NM_016175       | 0. 435289364  |
| Conti g57359_RC | -0. 515785028 |
| NM_016210       | 0. 510156078  |
| Conti g41883_RC | 0. 452605314  |
| NM_016496       | 0. 465568238  |
| NM_016644       | 0. 496075312  |
| NM_016647       | 0. 468041283  |
| NM_020142       | 0. 462221384  |
| NM_020143       | -0. 550549323 |
| NM_020163       | 0. 410097148  |
| NM_020313       | -0. 522449238 |
| NM_030802       | 0. 559161048  |
| NM_032509       | -0. 690120624 |
| NM_053040       | -0. 657321169 |
| NM_145232       | -0. 44823665  |
| NM_138771       | -0. 466713933 |
| NM_138363       | 0. 456266774  |
| BC006136        | -0. 593114842 |
| NM_138385       | 0. 405627795  |
| NM_138386       | -0. 450078888 |
| NM_138779       | -0. 693150357 |
| NM_138397       | -0. 401923122 |
| NM_018361       | -0. 519383728 |
| NM_145886       | 0. 489732465  |
| NM_052972       | -0. 586897668 |
| NM_181726       | -0. 685823523 |
| NM_002337       | 0. 421577755  |
| NM_025168       | 0. 526336484  |
| NM_018205       | 0. 466299182  |
| NM_018334       | 0. 445493851  |
| NM_032808       | 0. 530036071  |
| NM_138361       | 0. 461868709  |
| NM_014462       | -0. 509450576 |
| NM_032881       | -0. 413598715 |
| NM_021070       | 0. 40587475   |
| NM_000897       | 0. 515061622  |
| NM_016153       | 0. 589509759  |
| NM_017816       | -0. 60568833  |
| NM_014573       | -0. 492007489 |
| Conti g46202    | -0. 439963201 |
| NM_014628       | -0. 442640986 |
| NM_015583       | 0. 462712798  |
| NM_005902       | -0. 506305734 |
| NM_012323       | -0. 674021326 |
| NM_002359       | -0. 441931825 |
| NM_014599       | 0. 432688573  |
| NM_030801       | 0. 590773777  |
| NM_173515       | -0. 572756486 |
| NM_031419       | -0. 702351322 |
| NM_025146       | -0. 448692136 |
| NM_145160       | 0. 457439968  |
| Conti g40090_RC | -0. 416245515 |
| NM_145333       | -0. 463297667 |
| NM_006116       | 0. 54657725   |
| NM_005204       | -0. 507998479 |
| NM_004579       | 0. 523841995  |
| NM_018194       | 0. 472442498  |
| AK054569        | -0. 681384227 |
| NM_005911       | -0. 766708975 |
| NM_002382       | -0. 483065458 |
| NM_182763       | -0. 570691616 |
| NM_006739       | 0. 492318649  |
| NM_005916       | 0. 594617394  |
| Conti g48371    | 0. 530304093  |

|                 |               |
|-----------------|---------------|
| NM_020231       | -0. 501184593 |
| NM_152305       | -0. 638266323 |
| NM_018463       | 0. 543197146  |
| NM_018466       | -0. 497243465 |
| NM_005466       | 0. 498240108  |
| NM_024102       | -0. 429209025 |
| NM_022566       | -0. 690111961 |
| NM_138395       | -0. 825030872 |
| NM_005371       | -0. 688765837 |
| NM_005927       | -0. 662344774 |
| NM_030780       | -0. 563862468 |
| NM_012214       | -0. 441533618 |
| NM_031492       | 0. 509564277  |
| NM_033212       | 0. 62814987   |
| NM_032889       | -0. 568003994 |
| NM_032683       | -0. 419150089 |
| NM_152288       | 0. 49820224   |
| NM_032711       | -0. 492253543 |
| NM_032356       | 0. 421863992  |
| NM_032334       | -0. 419073125 |
| NM_032338       | -0. 485757706 |
| NM_032369       | 0. 408241748  |
| NM_032756       | -0. 573048461 |
| NM_053047       | -0. 606643602 |
| BC007381        | 0. 405374626  |
| NM_052943       | 0. 510799612  |
| NM_052880       | 0. 719017806  |
| NM_080655       | -0. 570585199 |
| NM_152452       | 0. 449869173  |
| NM_152421       | 0. 524943099  |
| NM_052857       | -0. 531944593 |
| NM_138417       | -0. 500130546 |
| NM_182614       | 0. 404504108  |
| Conti g49520_RC | 0. 428012182  |
| NM_032331       | -0. 604014753 |
| NM_152430       | 0. 458615229  |
| U78519          | -0. 677346759 |
| Conti g60301_RC | 0. 403612173  |
| NM_152783       | 0. 597524475  |
| NM_032631       | 0. 52555459   |
| NM_152339       | -0. 513328322 |
| NM_032701       | 0. 556358442  |
| NM_032299       | -0. 497718731 |
| NM_024297       | -0. 597507502 |
| NM_031298       | -0. 544462964 |
| NM_014388       | -0. 551572695 |
| NM_144638       | 0. 448475144  |
| NM_032285       | 0. 531639343  |
| NM_023947       | 0. 400788826  |
| NM_153374       | -0. 477256209 |
| NM_152435       | 0. 424238245  |
| NM_182550       | 0. 411775046  |
| NM_152318       | -0. 662053305 |
| NM_152755       | 0. 63751532   |
| NM_153361       | 0. 456842781  |
| NM_031304       | -0. 465602929 |
| NM_152711       | -0. 456041967 |
| NM_182552       | 0. 430522206  |
| NM_024111       | -0. 432527273 |
| NM_152398       | 0. 492870428  |
| NM_152464       | -0. 490237015 |
| Conti g29982_RC | 0. 501067612  |
| NM_032326       | 0. 458703165  |
| NM_033309       | 0. 449721274  |
| NM_052871       | -0. 517687079 |

|                 |               |
|-----------------|---------------|
| NM_032314       | 0. 43789998   |
| NM_178450       | -0. 520731059 |
| NM_178540       | 0. 526405782  |
| NM_024116       | -0. 648282773 |
| NM_032740       | 0. 467898825  |
| NM_024092       | 0. 415919428  |
| NM_016500       | -0. 551062956 |
| NM_173638       | 0. 418430156  |
| NM_012215       | 0. 574721387  |
| AL512725        | -0. 715514652 |
| NM_021242       | -0. 527734871 |
| NM_032390       | -0. 783272114 |
| NM_022443       | -0. 438120248 |
| NM_005938       | 0. 559032831  |
| NM_023009       | -0. 462449921 |
| NM_024101       | 0. 425015548  |
| NM_033467       | 0. 585631292  |
| AK057179        | 0. 560056855  |
| NM_002422       | -0. 618413502 |
| NM_022362       | 0. 419086888  |
| Conti g48290_RC | -0. 503447152 |
| Conti g57496_RC | -0. 458809955 |
| NM_145279       | -0. 402415657 |
| NM_005942       | 0. 404106132  |
| NM_019556       | -0. 515975742 |
| NM_023948       | 0. 477534775  |
| NM_005791       | -0. 582621942 |
| NM_032111       | -0. 582683324 |
| NM_031903       | -0. 538754551 |
| NM_172177       | -0. 453005978 |
| NM_016055       | 0. 404460229  |
| NM_019051       | -0. 504349288 |
| NM_015969       | -0. 457197942 |
| NM_016067       | 0. 411634847  |
| NM_016034       | -0. 451633133 |
| NM_016640       | -0. 422472581 |
| NM_021821       | -0. 41462164  |
| NM_032476       | 0. 565000311  |
| NM_005098       | -0. 450344612 |
| NM_172165       | 0. 476085403  |
| NM_012331       | 0. 464321611  |
| NM_020998       | 0. 505289002  |
| NM_002447       | 0. 516546996  |
| NM_002448       | -0. 485629401 |
| NM_002449       | -0. 413419788 |
| NM_014507       | -0. 428826108 |
| NM_005946       | -0. 66367864  |
| NM_005951       | -0. 537352106 |
| NM_175622       | -0. 51273312  |
| NM_176870       | -0. 513367896 |
| NM_002450       | -0. 426813741 |
| NM_005952       | -0. 533992802 |
| NM_005953       | -0. 628297825 |
| NM_004739       | -0. 468829834 |
| AB033092        | 0. 59150967   |
| NM_005955       | -0. 41287734  |
| NM_006636       | -0. 638765126 |
| NM_152912       | 0. 42142225   |
| NM_015458       | -0. 460808797 |
| NM_173710       | 0. 546521573  |
| NM_138299       | 0. 504564558  |
| NM_032220       | 0. 449820308  |
| NM_006454       | 0. 616368178  |
| NM_004997       | -0. 610697192 |
| NM_002467       | -0. 736700746 |

|                 |              |
|-----------------|--------------|
| NM_002468       | -0.403896284 |
| NM_004998       | -0.523036353 |
| Conti g31192_RC | -0.404469546 |
| NM_014664       | -0.487245231 |
| NM_015909       | 0.523207188  |
| NM_024865       | 0.467887271  |
| Conti g6323_RC  | 0.452444039  |
| NM_003826       | -0.41459008  |
| Conti g33758_RC | -0.502686064 |
| NM_032041       | 0.609922217  |
| AK054570        | 0.596744922  |
| NM_002486       | -0.435788573 |
| NM_007362       | -0.422803764 |
| NM_080678       | -0.416922212 |
| NM_016453       | 0.546244516  |
| NM_005381       | -0.423038219 |
| NM_024831       | -0.603849054 |
| NM_030808       | -0.458420983 |
| NM_138704       | -0.594743661 |
| NM_032013       | 0.607955716  |
| NM_003635       | -0.529842849 |
| NM_015277       | 0.426090781  |
| NM_024608       | 0.581051549  |
| NM_152720       | 0.544211383  |
| NM_014397       | -0.728596954 |
| NM_080741       | -0.646138925 |
| NM_006162       | 0.487550076  |
| NM_006164       | -0.534017864 |
| NM_005384       | -0.418873251 |
| NM_002502       | -0.518325285 |
| NM_004556       | -0.545945542 |
| NM_014847       | -0.619469918 |
| NM_024946       | 0.492050409  |
| NM_030922       | -0.469293955 |
| NM_007184       | 0.430708201  |
| NM_033120       | -0.535603468 |
| NM_006167       | -0.634055483 |
| NM_000269       | -0.453647322 |
| NM_015039       | 0.545036472  |
| NM_006169       | -0.675463353 |
| NM_014062       | -0.586832465 |
| NM_006067       | -0.447082041 |
| NM_006170       | -0.72051043  |
| NM_006392       | -0.670627741 |
| NM_139235       | -0.568903133 |
| NM_017948       | -0.559728296 |
| NM_018983       | -0.591898561 |
| NM_018648       | -0.435579845 |
| NM_004741       | -0.726044051 |
| NM_015934       | -0.713667805 |
| NM_020962       | 0.455383442  |
| NM_052946       | 0.495184087  |
| AF039697        | 0.43430908   |
| NM_000270       | -0.69672123  |
| NM_000271       | -0.594963187 |
| NM_024663       | 0.410390192  |
| NM_003717       | 0.478297459  |
| NM_002523       | -0.430081333 |
| NM_002135       | -0.682183927 |
| NM_173198       | -0.775955503 |
| NM_002524       | -0.461286318 |
| NM_030759       | -0.606106442 |
| NM_017544       | -0.620636696 |
| NM_013981       | 0.61406487   |
| NM_004883       | 0.612312822  |

|                 |               |
|-----------------|---------------|
| NM_013982       | 0. 600911208  |
| NM_018534       | -0. 43741029  |
| NM_014366       | -0. 673802168 |
| NM_173474       | 0. 409439482  |
| NM_002528       | 0. 548608335  |
| NM_021229       | 0. 404388439  |
| NM_005013       | 0. 403035128  |
| NM_006185       | 0. 618077394  |
| NM_005124       | -0. 427173574 |
| NM_153684       | -0. 447408974 |
| NM_016320       | -0. 415279385 |
| NM_139131       | -0. 667151827 |
| NM_014778       | -0. 671048385 |
| NM_013248       | -0. 769339544 |
| NM_002542       | 0. 401344933  |
| NM_178014       | 0. 433143747  |
| NM_014279       | 0. 417145953  |
| NM_182487       | 0. 465621306  |
| NM_020190       | 0. 473991478  |
| NM_006812       | 0. 466520132  |
| NM_014835       | 0. 475968514  |
| NM_017731       | 0. 492144869  |
| NM_020530       | -0. 712305997 |
| NM_053001       | 0. 517179161  |
| NM_178129       | -0. 435344638 |
| NM_020804       | 0. 428702054  |
| NM_022490       | -0. 45661415  |
| NM_017906       | -0. 760562067 |
| NM_024594       | -0. 461964208 |
| Conti g51888_RC | -0. 554812738 |
| NM_015368       | -0. 68568502  |
| NM_018109       | -0. 461653538 |
| NM_007262       | 0. 53665158   |
| NM_182790       | -0. 428364479 |
| NM_005746       | -0. 622991761 |
| NM_025245       | 0. 411878714  |
| AL137559        | 0. 611331204  |
| NM_020418       | 0. 403465348  |
| NM_019035       | -0. 456338951 |
| NM_000439       | -0. 567556034 |
| Conti g51403_RC | -0. 539477055 |
| NM_005017       | -0. 559492447 |
| D80007          | -0. 613635803 |
| NM_145341       | 0. 563217074  |
| Conti g49768_RC | -0. 50576173  |
| NM_022341       | -0. 520172204 |
| NM_033023       | -0. 550537869 |
| NM_006207       | 0. 411049867  |
| NM_020992       | -0. 602591672 |
| NM_003687       | -0. 465906632 |
| NM_013377       | 0. 42799845   |
| NM_021830       | -0. 734844022 |
| NM_014935       | 0. 437912992  |
| NM_002616       | 1             |
| NM_014303       | -0. 514217344 |
| NM_012394       | -0. 524867339 |
| NM_004566       | 0. 574231888  |
| NM_000289       | 0. 41178146   |
| NM_170753       | 0. 43068367   |
| NM_032592       | 0. 560287785  |
| NM_004427       | -0. 484028304 |
| AL117477        | 0. 527950496  |
| AK026181        | -0. 594369541 |
| NM_006099       | 0. 45822643   |
| NM_004569       | -0. 638051782 |

|                 |              |
|-----------------|--------------|
| NM_178517       | -0.721128909 |
| NM_003557       | -0.622652765 |
| NM_012417       | -0.462316285 |
| Conti g43433_RC | -0.479685958 |
| NM_024874       | 0.619926177  |
| NM_000299       | -0.500106566 |
| NM_005090       | 0.588357764  |
| NM_000929       | 0.499906718  |
| NM_002657       | -0.504516582 |
| NM_000930       | 0.429138442  |
| NM_002658       | -0.578389701 |
| NM_182811       | 0.449071654  |
| NM_002663       | 0.548641425  |
| AF131859        | -0.43655014  |
| NM_024310       | 0.716359931  |
| AB033035        | -0.47689672  |
| AB002354        | -0.485009744 |
| NM_006622       | -0.411611193 |
| NM_004073       | -0.532739752 |
| NM_002669       | -0.401276502 |
| NM_021105       | -0.602208721 |
| NM_020360       | 0.450911971  |
| NM_015103       | 0.4239946    |
| NM_021127       | -0.424919963 |
| NM_000303       | -0.622570478 |
| NM_033109       | -0.618514933 |
| NM_002688       | 0.438245479  |
| NM_004574       | 0.505934188  |
| NM_153703       | 0.503113923  |
| NM_017542       | -0.658683399 |
| NM_002690       | 0.450268293  |
| NM_017443       | -0.429190388 |
| NM_004875       | -0.454877837 |
| NM_004805       | -0.729564887 |
| NM_018119       | -0.465009757 |
| NM_172020       | -0.531500959 |
| NM_007171       | 0.440035856  |
| NM_000940       | 0.434593244  |
| NM_015029       | -0.684663582 |
| NM_025204       | -0.441920841 |
| NM_152301       | -0.529559448 |
| NM_025201       | -0.439011241 |
| NM_020230       | -0.655915485 |
| NM_006238       | -0.498414525 |
| NM_177435       | -0.625558237 |
| NM_002703       | -0.718930254 |
| NM_177444       | 0.604229074  |
| Conti g42058_RC | 0.402622081  |
| NM_006112       | 0.470211279  |
| NM_002705       | 0.605836191  |
| NM_002714       | -0.550277468 |
| NM_014330       | -0.512399504 |
| Conti g340_RC   | -0.538324633 |
| NM_015568       | 0.533478656  |
| NM_024607       | -0.413848806 |
| NM_002715       | -0.418899393 |
| NM_015062       | -0.734695081 |
| NM_138934       | 0.429544143  |
| NM_013239       | 0.565862727  |
| NM_012406       | -0.471453514 |
| NM_012094       | 0.44607724   |
| NM_002727       | -0.417558621 |
| NM_033405       | -0.408025792 |
| AK055479        | 0.598142016  |
| NM_002730       | 0.424269156  |

|                 |              |
|-----------------|--------------|
| Conti g55540_RC | -0.400452729 |
| NM_012408       | 0.68727537   |
| NM_018137       | -0.4900421   |
| Conti g37200_RC | -0.467233584 |
| NM_014138       | 0.499153574  |
| NM_018509       | -0.515298671 |
| NM_018621       | 0.428015747  |
| NM_018520       | 0.530841973  |
| NM_021935       | -0.52745682  |
| AK021524        | 0.45133069   |
| NM_004697       | -0.756818477 |
| NM_017456       | -0.54347888  |
| NM_004762       | -0.575790374 |
| NM_002790       | -0.539634154 |
| NM_152255       | -0.415418122 |
| NM_005789       | -0.64801611  |
| NM_031991       | -0.561247452 |
| NM_031990       | -0.562864963 |
| NM_002819       | -0.564442826 |
| NM_175847       | -0.567395755 |
| NM_003463       | -0.552849455 |
| NM_003479       | -0.416236003 |
| NM_002827       | -0.560939882 |
| NM_014369       | 0.522776254  |
| NM_080422       | -0.560029808 |
| NM_130435       | -0.440644937 |
| NM_130843       | 0.491594001  |
| NM_002852       | -0.765286445 |
| Conti g46241_RC | -0.452879481 |
| AK057669        | -0.540390344 |
| NM_025215       | -0.655972012 |
| NM_006505       | -0.698904059 |
| NM_007062       | -0.421751451 |
| NM_005049       | -0.645257648 |
| NM_002859       | -0.446173597 |
| NM_181701       | -0.573659219 |
| NM_024638       | -0.742720599 |
| NM_017817       | -0.43995171  |
| Conti g54258_RC | -0.436761387 |
| NM_020673       | -0.500497075 |
| Conti g32637_RC | -0.466623665 |
| NM_022456       | -0.46801184  |
| NM_012197       | 0.509702794  |
| NM_004582       | -0.42138043  |
| NM_013412       | 0.420668394  |
| NM_007081       | 0.43150992   |
| Conti g46590    | 0.472256144  |
| NM_134423       | 0.498281288  |
| NM_003610       | -0.430488153 |
| NM_017574       | -0.402080254 |
| NM_015577       | -0.505693021 |
| NM_021785       | 0.408900467  |
| AK055564        | -0.66811332  |
| NM_003979       | -0.704480677 |
| Conti g19194_RC | -0.49532801  |
| NM_015592       | 0.484852669  |
| NM_006105       | 0.576090754  |
| NM_012294       | -0.522971471 |
| NM_000964       | -0.685871086 |
| NM_170774       | -0.450870197 |
| NM_002894       | -0.454156285 |
| NM_022370       | 0.448188327  |
| NM_022768       | -0.580984668 |
| NM_032905       | -0.561988961 |
| NM_022830       | -0.406236627 |



|                 |              |
|-----------------|--------------|
| NM_002896       | -0.479798191 |
| NM_016090       | -0.425507291 |
| NM_005105       | -0.42320968  |
| NM_016839       | -0.439929771 |
| NM_005772       | -0.433463615 |
| NM_021975       | -0.411391789 |
| NM_006509       | -0.625917119 |
| NM_014012       | 0.411495899  |
| NM_018339       | -0.49972912  |
| NM_017819       | -0.54191214  |
| NM_002928       | -0.680754898 |
| NM_002923       | -0.486980578 |
| Conti g44867_RC | -0.445559565 |
| NM_033345       | 0.415338106  |
| NM_014715       | 0.466349381  |
| NM_018372       | -0.425433281 |
| NM_004292       | -0.545533441 |
| NM_153005       | -0.708906237 |
| NM_018343       | -0.417971267 |
| NM_003804       | -0.516274206 |
| NM_003821       | -0.547743281 |
| NM_015444       | -0.638279059 |
| NM_006912       | -0.590006765 |
| NM_002933       | 0.405666305  |
| NM_002936       | -0.523560169 |
| Conti g684_RC   | -0.459549259 |
| NM_024787       | -0.563550377 |
| NM_024778       | -0.754696025 |
| NM_173647       | -0.417000086 |
| NM_007212       | -0.472942193 |
| NM_002938       | -0.504927608 |
| NM_005977       | -0.485361766 |
| NM_025065       | -0.437119406 |
| NM_144563       | -0.540474547 |
| NM_000988       | 0.405337547  |
| NM_021029       | -0.553020712 |
| NM_000973       | 0.566104005  |
| NM_001002       | 0.574644578  |
| NM_006638       | -0.665582303 |
| NM_005617       | 0.480140511  |
| NM_015169       | -0.717229931 |
| RSE_00000862609 | 0.475188021  |
| NM_001754       | -0.698257821 |
| NM_014328       | 0.450413134  |
| AB007857        | 0.502820769  |
| NM_002964       | -0.442074799 |
| NM_020368       | -0.5817933   |
| NM_002975       | 0.462420379  |
| NM_006998       | 0.44235665   |
| NM_006746       | -0.428476525 |
| NM_006089       | -0.403329473 |
| NM_174934       | 0.47671422   |
| NM_005138       | -0.561008247 |
| NM_002999       | -0.650692576 |
| NM_006649       | -0.694171692 |
| NM_006643       | -0.517846278 |
| NM_022044       | -0.421263498 |
| NM_031216       | -0.532682116 |
| NM_032970       | -0.408094217 |
| NM_007190       | -0.50281818  |
| NM_015490       | 0.498106357  |
| NM_013336       | -0.411036746 |
| NM_003004       | -0.536767694 |
| NM_000450       | -0.60144956  |
| NM_003944       | 0.410433725  |

|                 |               |
|-----------------|---------------|
| NM_018445       | -0. 522238851 |
| NM_004186       | -0. 560801057 |
| NM_017789       | -0. 511400737 |
| NM_152699       | -0. 648540381 |
| NM_012248       | -0. 751403384 |
| NM_030666       | -0. 456469564 |
| NM_002575       | -0. 475308484 |
| NM_002640       | -0. 668038512 |
| NM_000602       | -0. 563594559 |
| NM_013376       | -0. 735676145 |
| NM_014755       | -0. 463406754 |
| NM_003011       | -0. 468272643 |
| NM_015559       | 0. 490460438  |
| NM_012432       | 0. 415817521  |
| NM_004630       | -0. 423298791 |
| NM_005066       | -0. 553684037 |
| NM_006924       | -0. 428445196 |
| NM_004593       | -0. 581413885 |
| NM_003016       | -0. 411814288 |
| NM_003017       | -0. 568165022 |
| NM_006276       | -0. 57475094  |
| NM_005627       | -0. 507364628 |
| NM_015503       | 0. 425154284  |
| NM_031469       | 0. 40176193   |
| NM_020145       | 0. 581803919  |
| NM_020870       | -0. 455800915 |
| Conti g60194_RC | -0. 544753259 |
| NM_020859       | 0. 470759177  |
| NM_173216       | 0. 542634024  |
| NM_018414       | 0. 507811557  |
| NM_152996       | -0. 534731992 |
| AB037810        | -0. 480639467 |
| NM_012240       | 0. 487001831  |
| NM_031244       | 0. 594283839  |
| NM_012241       | 0. 441890969  |
| NM_005982       | 0. 404435204  |
| NM_016932       | -0. 533716538 |
| NM_175875       | 0. 433520497  |
| NM_016532       | 0. 447689248  |
| NM_003037       | -0. 484549717 |
| AL117421        | 0. 401849117  |
| NM_006527       | -0. 531452884 |
| NM_000617       | -0. 421181361 |
| NM_004207       | -0. 534130462 |
| NM_006996       | -0. 436706858 |
| Conti g44425_RC | -0. 47373191  |
| NM_005415       | -0. 657600806 |
| NM_006749       | -0. 637609879 |
| NM_016609       | 0. 470148382  |
| NM_007105       | -0. 519578002 |
| NM_014251       | -0. 478442763 |
| NM_014252       | -0. 527814732 |
| NM_021734       | -0. 573007576 |
| AK057476        | 0. 520416988  |
| NM_024698       | -0. 615534844 |
| AB067483        | -0. 601560866 |
| AK025078        | -0. 460875471 |
| Conti g58471_RC | 0. 431273408  |
| NM_006516       | -0. 506758445 |
| NM_153449       | -0. 581254475 |
| NM_006931       | -0. 686631212 |
| NM_020062       | 0. 463370531  |
| NM_003039       | -0. 629465665 |
| NM_021194       | -0. 506453611 |
| NM_017964       | -0. 450719811 |

|                 |               |
|-----------------|---------------|
| Conti g25949_RC | -0. 403979578 |
| NM_005827       | -0. 651358609 |
| NM_015945       | 0. 411987846  |
| NM_182838       | 0. 555957026  |
| NM_014854       | 0. 508817637  |
| NM_017515       | -0. 492602342 |
| NM_001467       | 0. 402868767  |
| NM_018573       | -0. 413376992 |
| NM_018976       | -0. 418611789 |
| D31887          | -0. 63131376  |
| NM_002394       | -0. 574140046 |
| NM_017836       | 0. 519185601  |
| NM_017611       | -0. 554548085 |
| NM_003615       | -0. 732054534 |
| AL050021        | -0. 791016195 |
| NM_003486       | -0. 70052804  |
| NM_004785       | 0. 424023745  |
| NM_173653       | 0. 419773403  |
| NM_016354       | -0. 416188961 |
| NM_003072       | -0. 420773938 |
| NM_139067       | 0. 524116856  |
| NM_015110       | -0. 474839185 |
| NM_005631       | 0. 468517006  |
| NM_022739       | -0. 596464023 |
| NM_173354       | -0. 613780536 |
| NM_018664       | -0. 700513871 |
| NM_024700       | -0. 413114488 |
| NM_003498       | -0. 514307323 |
| NM_003091       | -0. 52084464  |
| NM_006938       | -0. 540598465 |
| NM_003094       | -0. 447219679 |
| NM_003095       | -0. 408113069 |
| NM_003097       | 0. 446267936  |
| NM_005678       | 0. 430539614  |
| NM_013323       | -0. 544426148 |
| NM_003101       | -0. 449295067 |
| NM_003745       | -0. 533051419 |
| NM_004232       | -0. 439083063 |
| BC001980        | -0. 545552181 |
| NM_000636       | -0. 611011864 |
| NM_006942       | 0. 495690452  |
| NM_022454       | -0. 455082229 |
| NM_031439       | -0. 635516535 |
| NM_003971       | -0. 507054828 |
| NM_024063       | -0. 532378522 |
| NM_018418       | 0. 457996387  |
| NM_020239       | -0. 446256511 |
| NM_021972       | -0. 643775825 |
| NM_152594       | -0. 65509102  |
| AF041037        | -0. 410554981 |
| NM_030964       | -0. 540618584 |
| NM_007173       | -0. 450851276 |
| NM_003900       | -0. 401274451 |
| NM_003131       | -0. 469746388 |
| NM_003135       | -0. 463891004 |
| NM_021203       | -0. 645763546 |
| Conti g14796_RC | -0. 450421124 |
| NM_016305       | -0. 519850016 |
| NM_004600       | -0. 412728279 |
| NM_080862       | 0. 408654084  |
| NM_017857       | 0. 588952965  |
| NM_024937       | -0. 443101051 |
| NM_013437       | -0. 443947715 |
| NM_003473       | -0. 442510391 |
| NM_139164       | -0. 400639019 |

|                 |              |
|-----------------|--------------|
| Conti g57662_RC | -0.434538469 |
| AB037721        | 0.613900439  |
| NM_139276       | -0.488492397 |
| NM_003150       | -0.587439813 |
| NM_004760       | -0.637740789 |
| NM_006374       | 0.468234234  |
| NM_004099       | -0.422630925 |
| NM_177424       | -0.416523918 |
| NM_001055       | 0.412588179  |
| NM_003166       | 0.485380961  |
| NM_177552       | 0.482909098  |
| NM_019601       | 0.571261221  |
| NM_004711       | 0.577311316  |
| NM_006474       | -0.558092238 |
| NM_052864       | -0.638251503 |
| Conti g16654_RC | -0.413643696 |
| NM_006354       | 0.542360493  |
| NM_139352       | -0.432219001 |
| Conti g51821_RC | -0.450070051 |
| NM_005641       | 0.424040813  |
| NM_032505       | -0.686207855 |
| NM_133484       | -0.401969989 |
| NM_018009       | 0.457042849  |
| NM_005646       | 0.406372284  |
| NM_003191       | -0.4192735   |
| NM_015472       | -0.651501601 |
| NM_181313       | 0.427600097  |
| NM_181314       | 0.417895118  |
| NM_024682       | 0.545081222  |
| NM_018421       | -0.573619075 |
| NM_025085       | -0.65321103  |
| NM_013254       | -0.418193375 |
| NM_032988       | -0.534018696 |
| NM_003198       | -0.596520071 |
| NM_003199       | 0.45016726   |
| NM_031283       | 0.441148681  |
| NM_003211       | -0.588956051 |
| NM_003213       | -0.703340181 |
| NM_170754       | 0.431268039  |
| NM_013319       | -0.596539515 |
| NM_001120       | 0.472409078  |
| NM_017746       | -0.640727525 |
| NM_022366       | -0.433518459 |
| NM_012143       | -0.4708206   |
| NM_003234       | -0.463623213 |
| NM_003236       | -0.672728603 |
| NM_003239       | -0.416388957 |
| AK002171        | -0.463690122 |
| NM_000361       | -0.573510074 |
| NM_003247       | -0.430576685 |
| NM_007112       | 0.534947252  |
| NM_005782       | -0.530485462 |
| AK054894        | -0.404182047 |
| NM_005121       | -0.40643676  |
| NM_005655       | -0.409289568 |
| NM_032862       | -0.431351853 |
| NM_012460       | -0.439116742 |
| NM_003254       | -0.40028845  |
| NM_015508       | -0.426983187 |
| NM_006289       | 0.408647174  |
| NM_003268       | 0.400882023  |
| NM_003272       | -0.457649777 |
| NM_013390       | -0.715811332 |
| NM_032780       | 0.483323846  |
| NM_016456       | 0.491971147  |

|                 |               |
|-----------------|---------------|
| NM_181428       | 0. 629772941  |
| NM_002160       | -0. 552214722 |
| NM_000594       | -0. 5893372   |
| NM_006291       | -0. 480297463 |
| NM_007115       | -0. 504384461 |
| NM_147187       | -0. 546359451 |
| Conti g54206_RC | -0. 474063408 |
| NM_016639       | -0. 531352361 |
| NM_001065       | -0. 617327884 |
| NM_003809       | 0. 498372068  |
| NM_024309       | -0. 433777183 |
| NM_014494       | 0. 438044159  |
| NM_016272       | 0. 428250494  |
| NM_019009       | -0. 468150939 |
| NM_006114       | -0. 59000563  |
| NM_003286       | -0. 435622624 |
| NM_005426       | -0. 548217156 |
| NM_018475       | -0. 536846892 |
| NM_006670       | -0. 40340949  |
| NM_003288       | -0. 713768734 |
| Z36778          | -0. 621093613 |
| NM_003290       | -0. 556691409 |
| NM_014317       | -0. 465414251 |
| NM_013315       | 0. 450552671  |
| NM_007064       | -0. 555253261 |
| NM_145725       | -0. 409112745 |
| NM_003300       | -0. 539921862 |
| NM_004295       | -0. 510519763 |
| NM_012288       | -0. 436570582 |
| NM_018643       | -0. 517705111 |
| NM_145273       | 0. 490851909  |
| NM_018415       | 0. 552365476  |
| NM_025195       | -0. 709719285 |
| NM_021158       | -0. 675831239 |
| NM_005082       | -0. 422866524 |
| NM_021616       | 0. 455511439  |
| NM_033549       | 0. 425991754  |
| NM_025188       | 0. 452062468  |
| NM_033093       | 0. 447463977  |
| NM_178125       | 0. 524044272  |
| NM_016157       | 0. 601792588  |
| NM_003303       | 0. 52357511   |
| NM_015638       | 0. 417661467  |
| NM_017636       | 0. 45653737   |
| NM_018727       | 0. 426590168  |
| NM_021055       | 0. 463092964  |
| NM_005725       | 0. 423270319  |
| NM_005706       | -0. 477021361 |
| NM_004623       | -0. 66263989  |
| NM_012263       | 0. 576249699  |
| NM_014640       | -0. 409343901 |
| NM_133378       | 0. 54714927   |
| Conti g2099_RC  | -0. 432249721 |
| NM_032704       | -0. 466938204 |
| Conti g57226_RC | -0. 4747845   |
| NM_006086       | -0. 48375736  |
| NM_016262       | -0. 491506615 |
| NM_016437       | 0. 561025006  |
| Conti g46324_RC | 0. 474467677  |
| NM_006545       | 0. 51336594   |
| Conti g35700_RC | -0. 525003126 |
| NM_006472       | 0. 491223091  |
| NM_003330       | -0. 630307131 |
| U17626          | -0. 567105251 |
| NM_014014       | 0. 50926719   |

|                 |               |
|-----------------|---------------|
| NM_018003       | 0. 636885067  |
| NM_003115       | -0. 502401139 |
| NM_016525       | -0. 43217959  |
| NM_003335       | 0. 40627262   |
| NM_003340       | -0. 519810238 |
| NM_016336       | -0. 483822039 |
| NM_016405       | -0. 445506481 |
| NM_003347       | 0. 421859793  |
| NM_003348       | -0. 435406227 |
| NM_017582       | -0. 591477456 |
| NM_006048       | 0. 453002892  |
| NM_014517       | -0. 466693162 |
| NM_053067       | -0. 593924878 |
| NM_013438       | -0. 594043185 |
| AF289595        | -0. 422450163 |
| NM_003359       | -0. 504677146 |
| NM_025217       | -0. 43463092  |
| Conti g47339_RC | -0. 652220584 |
| NM_012474       | -0. 744003488 |
| NM_005148       | 0. 407412426  |
| NM_080911       | 0. 448694741  |
| NM_181597       | -0. 65091339  |
| NM_000374       | 0. 411026541  |
| NM_031941       | 0. 470683932  |
| NM_182488       | -0. 450741303 |
| NM_017414       | 0. 472655496  |
| Conti g42760_RC | -0. 472388635 |
| NM_025090       | -0. 476890342 |
| NM_032557       | -0. 483687158 |
| AK001647        | 0. 420163696  |
| Conti g62923_RC | -0. 428666971 |
| NM_014871       | 0. 500813686  |
| NM_003574       | -0. 58191463  |
| NM_003370       | -0. 528202192 |
| NM_000376       | -0. 634665983 |
| NM_005429       | -0. 459232493 |
| NM_030938       | -0. 572969114 |
| NM_004665       | -0. 40192426  |
| Conti g46224_RC | -0. 502647686 |
| NM_080432       | -0. 411749898 |
| NM_015289       | 0. 450503961  |
| NM_004184       | -0. 446687547 |
| NM_012477       | 0. 543732351  |
| NM_175064       | 0. 587075493  |
| Conti g39451    | 0. 436368258  |
| NM_005112       | -0. 47504225  |
| NM_018256       | -0. 695111653 |
| NM_181340       | -0. 527482742 |
| NM_025160       | -0. 435077225 |
| NM_139281       | -0. 582714794 |
| NM_033662       | -0. 546820716 |
| NM_033661       | -0. 62158993  |
| NM_003880       | 0. 486565064  |
| NM_003391       | -0. 51428029  |
| NM_006522       | 0. 453703135  |
| NM_004906       | -0. 557447434 |
| NM_152857       | -0. 621267764 |
| NM_130788       | 0. 437577054  |
| NM_005080       | -0. 671034014 |
| NM_020750       | -0. 710616363 |
| NM_012255       | -0. 444064396 |
| NM_022167       | 0. 438995959  |
| NM_012479       | 0. 612463402  |
| NM_003405       | -0. 480623308 |
| NM_152444       | 0. 443029301  |

|                 |               |
|-----------------|---------------|
| NM_016653       | -0. 517762434 |
| NM_014838       | -0. 658517607 |
| NM_152735       | -0. 554596966 |
| NM_024625       | -0. 452429038 |
| NM_017665       | -0. 593555186 |
| NM_017742       | -0. 462526634 |
| NM_024630       | 0. 509339131  |
| NM_024721       | 0. 49807034   |
| NM_003407       | -0. 404480903 |
| NM_014733       | -0. 477777778 |
| NM_032850       | 0. 478690305  |
| NM_024071       | 0. 49092633   |
| NM_178451       | 0. 436742131  |
| NM_138462       | -0. 471437783 |
| U09410          | -0. 434923398 |
| NM_006006       | 0. 759698961  |
| NM_007145       | -0. 687335647 |
| NM_003451       | 0. 426661254  |
| NM_152736       | 0. 501854407  |
| NM_007152       | -0. 437606047 |
| NM_003457       | -0. 493237887 |
| NM_013398       | 0. 469444512  |
| NM_016444       | 0. 419865129  |
| Conti g48954_RC | 0. 514249111  |
| NM_005674       | -0. 69408861  |
| AK000435        | 0. 401328622  |
| NM_005774       | 0. 472128878  |
| NM_003904       | -0. 601028508 |
| NM_019591       | -0. 498420324 |
| NM_005096       | 0. 596204626  |
| NM_005741       | -0. 588322966 |
| NM_003414       | -0. 421393819 |
| NM_012482       | -0. 408364387 |
| Conti g28228    | 0. 547373652  |
| NM_019110       | 0. 412295282  |
| NM_018683       | -0. 44001161  |
| NM_014487       | -0. 469060062 |
| NM_022482       | -0. 572964503 |
| NM_030580       | 0. 420316581  |
| NM_005649       | -0. 634509258 |
| NM_058230       | -0. 477124802 |
| NM_018660       | 0. 44230271   |
| NM_003422       | 0. 426517015  |
| NM_030634       | -0. 419039423 |
| NM_014797       | -0. 443844243 |
| Conti g43253_RC | -0. 526510843 |
| NM_145312       | -0. 54036081  |
| NM_145291       | -0. 401259283 |
| NM_015461       | 0. 445132736  |
| NM_032423       | 0. 419482388  |
| NM_152303       | 0. 406077203  |
| NM_024341       | -0. 656254162 |
| NM_017656       | -0. 552810452 |
| NM_152412       | 0. 421075273  |
| NM_152360       | 0. 449854838  |
| NM_024327       | -0. 600149898 |
| NM_173548       | -0. 675744659 |
| NM_015871       | -0. 468622283 |
| Conti g2728_RC  | -0. 542610093 |
| NM_178167       | -0. 548639589 |
| NM_032689       | 0. 400104897  |
| AB075832        | 0. 53387601   |
| NM_003427       | 0. 483912966  |
| NM_003428       | -0. 450608123 |
| NM_170783       | -0. 642547775 |

|                 |              |
|-----------------|--------------|
| NM_147128       | -0.502567747 |
| X98260          | -0.573696154 |
| Conti g26988_RC | 0.661181818  |
| Conti g26760    | 0.610995176  |
| Conti g12369_RC | 0.606443235  |
| Conti g32577_RC | 0.604849298  |
| AK000802        | 0.597059643  |
| Conti g28286_RC | 0.59440912   |
| Conti g29226_RC | 0.587053109  |
| Conti g23198_RC | 0.586063799  |
| Conti g36902_RC | 0.583571924  |
| Conti g39408_RC | 0.567382824  |
| Conti g34395_RC | 0.551402552  |
| Conti g37895_RC | 0.549341532  |
| Conti g34872_RC | 0.545325387  |
| Conti g48430_RC | 0.540798777  |
| AF052101        | 0.532650191  |
| Conti g34701_RC | 0.524253948  |
| Conti g37142_RC | 0.521394385  |
| Conti g27084_RC | 0.516708125  |
| Conti g16786_RC | 0.513778912  |
| Conti g35897_RC | 0.507316342  |
| Conti g22534_RC | 0.507314591  |
| AL049337        | 0.501576194  |
| AI 401061_RC    | 0.496110515  |
| Conti g45970_RC | 0.495832759  |
| Conti g45303_RC | 0.492052158  |
| Conti g21679_RC | 0.491458426  |
| Conti g33003_RC | 0.486242254  |
| AF052138        | 0.48606201   |
| Conti g29513_RC | 0.483953802  |
| Conti g38647_RC | 0.480061606  |
| Conti g53177_RC | 0.476187008  |
| Conti g44987_RC | 0.474930124  |
| Conti g12814_RC | 0.474903433  |
| Conti g50731_RC | 0.471468508  |
| Conti g29380_RC | 0.468679316  |
| Conti g56689_RC | 0.468201977  |
| Conti g64477    | 0.464723303  |
| Conti g30955_RC | 0.463759031  |
| Conti g23408_RC | 0.46138933   |
| Conti g45914_RC | 0.458929405  |
| Conti g24308_RC | 0.457014891  |
| Conti g37761    | 0.453578459  |
| Conti g38914_RC | 0.453130742  |
| Conti g13300_RC | 0.452865958  |
| Conti g53342_RC | 0.452793682  |
| AL049279        | 0.451609253  |
| AL050145        | 0.451144025  |
| Conti g19384_RC | 0.448689174  |
| Conti g30213_RC | 0.441700593  |
| Conti g10844_RC | 0.437016684  |
| Conti g24152_RC | 0.432098211  |
| AF035318        | 0.43208524   |
| Conti g29022_RC | 0.431382556  |
| Conti g25075_RC | 0.431318035  |
| Conti g26077_RC | 0.431018298  |
| Conti g42038_RC | 0.431015509  |
| Conti g21421_RC | 0.425092744  |
| Conti g36931_RC | 0.424803681  |
| Conti g32810    | 0.422149675  |
| Conti g48722_RC | 0.420529876  |
| AF052119        | 0.420226231  |
| Conti g58121_RC | 0.418652808  |
| Conti g15381_RC | 0.417455023  |



|                 |               |
|-----------------|---------------|
| Conti g32798_RC | 0. 41730218   |
| Conti g34112_RC | 0. 41683239   |
| Conti g33574_RC | 0. 414601936  |
| Conti g48076_RC | 0. 41432023   |
| Conti g15693_RC | 0. 413342263  |
| Conti g52463_RC | 0. 413104891  |
| Conti g297_RC   | 0. 406534915  |
| Conti g31596_RC | 0. 402322904  |
| AL137723        | 0. 401470524  |
| Conti g47247_RC | 0. 400971629  |
| Conti g24259_RC | -0. 409628464 |
| AL157488        | -0. 415873279 |
| Conti g50584_RC | -0. 418463338 |
| Conti g51292_RC | -0. 418919002 |
| Conti g18246_RC | -0. 420962148 |
| Conti g55785_RC | -0. 426244011 |
| AK021516        | -0. 43067411  |
| Conti g16192_RC | -0. 441903058 |
| Conti g31872_RC | -0. 443803132 |
| Conti g21370_RC | -0. 44466935  |
| AL359055        | -0. 450262694 |
| Conti g45298_RC | -0. 458078659 |
| Conti g47381_RC | -0. 46834281  |
| Conti g59080    | -0. 475883335 |
| Conti g51486_RC | -0. 482995409 |
| Conti g688_RC   | -0. 483485346 |
| Conti g37042_RC | -0. 506225915 |
| Conti g46563_RC | -0. 515788169 |
| Conti g35400_RC | -0. 522519193 |
| Conti g45549_RC | -0. 529786997 |
| Conti g66868_RC | -0. 532640926 |
| Conti g111_RC   | -0. 539482129 |
| Conti g36419_RC | -0. 540799008 |
| Conti g51764_RC | -0. 545862923 |
| Conti g51066_RC | -0. 551908027 |
| Conti g21997_RC | -0. 55675907  |
| Conti g47879_RC | -0. 577979582 |
| Conti g43853_RC | -0. 585586709 |
| Conti g13480_RC | -0. 592184549 |
| Conti g23085_RC | -0. 59656151  |
| Conti g48806_RC | -0. 604500591 |
| Conti g26835_RC | -0. 625611852 |
| Conti g58279_RC | -0. 673765166 |
| Conti g40785_RC | -0. 682206604 |
| Conti g47512_RC | -0. 70157899  |
