# Supplementary material for: Diurnal variation of the human adipose transcriptome and the link to metabolic disease
Source: PubMed Central journal article supplement (PMC2647943; doi:10.1186/1755-8794-2-7), 2009-02-09
Supplement: 1755-8794-2-7-S9.pdf [file 1755-8794-2-7-S9.pdf]

| Symbol    | UGCI        | uster                               | Name                                                                                                                        | LLID     | UGRepAcc  |
|-----------|-------------|-------------------------------------|-----------------------------------------------------------------------------------------------------------------------------|----------|-----------|
| Genes     | upregulated | with                                | growth factors                                                                                                              |          |           |
| DDAH1     | Hs. 379858  |                                     | Dimethylarginine dimethylaminohydrolase 1                                                                                   |          | 23576     |
| NM_012137 |             |                                     |                                                                                                                             |          |           |
| RQCD1     | Hs. 148767  |                                     | RCD1 required for cell differentiation1 homolog (S. pombe)                                                                  |          |           |
| 9125      | BM925206    |                                     |                                                                                                                             |          |           |
| CSTF2     | Hs. 132370  |                                     | "Cleavage stimulation factor, 3' pre-RNA, subunit 2, 64kDa"                                                                 |          |           |
| 1478      | AK095684    |                                     |                                                                                                                             |          |           |
| EEF1E1    | Hs. 631818  |                                     | Eukaryotic translation elongation factor 1 epsilon 1                                                                        |          | 9521      |
| BC005291  |             |                                     |                                                                                                                             |          |           |
| PSMA4     | Hs. 251531  |                                     | "Proteasome (prosome, macropain) subunit, alpha type, 4"                                                                    |          |           |
| 5685      | BC030529    |                                     |                                                                                                                             |          |           |
| PSMA3     | Hs. 558799  |                                     | "Proteasome (prosome, macropain) subunit, alpha type, 3"                                                                    |          |           |
| 5684      | BM918616    |                                     |                                                                                                                             |          |           |
| PSMB1     | Hs. 352768  |                                     | "Proteasome (prosome, macropain) subunit, beta type, 1"                                                                     |          | 5689      |
| AB209078  |             |                                     |                                                                                                                             |          |           |
| ODC1      | Hs. 467701  |                                     | Ornithine decarboxylase 1                                                                                                   | 4953     | CR614398  |
| EIF5A     | Hs. 534314  |                                     | Eukaryotic translation initiation factor 5A                                                                                 |          | 1984      |
| CR622789  |             |                                     |                                                                                                                             |          |           |
| UCHL3     | Hs. 162241  |                                     | Ubiquitin carboxyl-terminal esterase L3 (ubiquitin thiol esterase)                                                          |          | 7347      |
| FAM98A    | Hs. 468140  |                                     | "Family with sequence similarity 98, member A"                                                                              |          | 25940     |
| AK096187  |             |                                     |                                                                                                                             |          |           |
| PFDN2     | Hs. 492516  |                                     | Prefoldin subunit 2                                                                                                         | 5202     | BF203500  |
| NARG1     | Hs. 555985  |                                     | NMDA receptor regulated 1                                                                                                   | 80155    | NM_057175 |
| EXOSC3    | Hs. 591076  |                                     | Exosome component 3                                                                                                         | 51010    | NM_016042 |
| UBE2V2    | Hs. 491695  |                                     | Ubiquitin-conjugating enzyme E2 variant 2                                                                                   |          | 7336      |
| AK094617  |             |                                     |                                                                                                                             |          |           |
| DPH2      | Hs. 632398  |                                     | DPH2 homolog (S. cerevisiae)                                                                                                | 1802     | NM_001384 |
| SLC25A32  | Hs. 654812  |                                     | "Solute carrier family 25, member 32"                                                                                       |          | 81034     |
| NM_030780 |             |                                     |                                                                                                                             |          |           |
| MRPS23    | Hs. 5836    | Mitochondrial ribosomal protein S23 |                                                                                                                             | 51649    | BE782112  |
| PSMC4     | Hs. 211594  |                                     | "Proteasome (prosome, macropain) 26S subunit, ATPase, 4"                                                                    |          |           |
| 5704      | CR611800    |                                     |                                                                                                                             |          |           |
| KBTBD6    | Hs. 534040  |                                     | Kelch repeat and BTB (POZ) domain containing 6                                                                              |          | 89890     |
| NM_152903 |             |                                     |                                                                                                                             |          |           |
| SUB1      | Hs. 229641  |                                     | SUB1 homolog (S. cerevisiae)                                                                                                | 10923    | BX537584  |
| NIIP7     | Hs. 585728  |                                     | Nuclear import 7 homolog (S. cerevisiae)                                                                                    |          | 51388     |
| NM_016101 |             |                                     |                                                                                                                             |          |           |
| MRPL50    | Hs. 288224  |                                     | Mitochondrial ribosomal protein L50                                                                                         | 54534    | BE893534  |
| TPI1      | Hs. 524219  |                                     | Triosephosphate isomerase 1                                                                                                 | 7167     | BM913099  |
| CCNA2     | Hs. 58974   |                                     | Cyclin A2                                                                                                                   | 890      | CR604810  |
| GART      | Hs. 473648  |                                     | "Phosphoribosylglycinamide formyltransferase, phosphoribosylglycinamide synthetase, phosphoribosylaminimidazole synthetase" |          | 2618      |
| BC068438  |             |                                     |                                                                                                                             |          |           |
| MYC       | Hs. 202453  |                                     | V-myc myelocytomatosis viral oncogene homolog (avian)                                                                       |          | 4609      |
| NM_002467 |             |                                     |                                                                                                                             |          |           |
| RANBP1    | Hs. 24763   |                                     | RAN binding protein 1                                                                                                       | 5902     | AK094410  |
| CDC45L    | Hs. 474217  |                                     | CDC45 cell division cycle 45-like (S. cerevisiae)                                                                           |          | 8318      |
| NM_003504 |             |                                     |                                                                                                                             |          |           |
| RAD54L    | Hs. 653212  |                                     | RAD54-like (S. cerevisiae)                                                                                                  | 8438     | NM_003579 |
| ATAD3A    | Hs. 655253  |                                     | "ATPase family, AAA domain containing 3A"                                                                                   |          | 55210     |
| AK092833  |             |                                     |                                                                                                                             |          |           |
| LDHA      | Hs. 2795    | Lactate dehydrogenase A             | 3939                                                                                                                        | BM457440 |           |
| IFRD2     | Hs. 315177  |                                     | Interferon-related developmental regulator 2                                                                                |          | 7866      |
| Y12395    |             |                                     |                                                                                                                             |          |           |
| EXOSC8    | Hs. 294041  |                                     | Exosome component 8                                                                                                         | 11340    | AK096810  |
| DLEU2     | Hs. 547964  |                                     | "Deleted in lymphocytic leukemia, 2"                                                                                        | 8847     | AF264787  |
| TAF1A     | Hs. 153088  |                                     | "TATA box binding protein (TBP)-associated factor, RNA polymerase I, A, 48kDa"                                              | 9015     | NM_005681 |
| ATP1B1    | Hs. 291196  |                                     | "ATPase, Na <sup>+</sup> /K <sup>+</sup> transporting, beta 1 polypeptide"                                                  |          | 481       |
| NM_001677 |             |                                     |                                                                                                                             |          |           |
| E2F7      | Hs. 416375  |                                     | E2F transcription factor 7                                                                                                  | 144455   | AK096316  |
| UCK2      | Hs. 458360  |                                     | Uridine-cytidine kinase 2                                                                                                   | 7371     | BX640859  |
| CTPS      | Hs. 473087  |                                     | CTP synthase                                                                                                                | 1503     | BC009408  |

|           |            |                                                           |                 |
|-----------|------------|-----------------------------------------------------------|-----------------|
| NOLC1     | Hs. 523238 | Nucleolar and coiled-body phosphoprotein 1                | 9221            |
| D21262    |            |                                                           |                 |
| MCM7      | Hs. 438720 | Minichromosome maintenance complex component 7            | 4176            |
| NM_182776 |            |                                                           |                 |
| CDCA4     | Hs. 34045  | Cell division cycle associated 4                          | 55038 BG354577  |
| MCM10     | Hs. 198363 | Minichromosome maintenance complex component 10           | 55388           |
| AL136840  |            |                                                           |                 |
| LETM1     | Hs. 120165 | Leucine zipper-EF-hand containing transmembrane protein 1 |                 |
| 3954      | BX537709   |                                                           |                 |
| TRI P13   | Hs. 436187 | Thyroid hormone receptor interactor 13                    | 9319 NM_004237  |
| HNRPAB    | Hs. 248746 | Heterogeneous nuclear ribonucleoprotein A/B               | 3182            |
| AK123488  |            |                                                           |                 |
| NUP155    | Hs. 547696 | Nucleoporin 155kDa                                        | 9631 BC039257   |
| CSE1L     | Hs. 90073  | CSE1 chromosome segregation 1-like (yeast)                | 1434            |
| NM_001316 |            |                                                           |                 |
| WDR62     | Hs. 116244 | WD repeat domain 62                                       | 284403 BC058939 |
| SHCBP1    | Hs. 123253 | SHC SH2-domain binding protein 1                          | 79801 BC030699  |
| DTYMK     | Hs. 471873 | Deoxythymidylate kinase (thymidylate kinase)              | 1841            |
| AF258562  |            |                                                           |                 |
| DKC1      | Hs. 4747   | "Dyskeratosis congenita 1, dyskerin"                      | 1736 BC009928   |
| ZWINT     | Hs. 591363 | ZW10 interactor 11130                                     | CR624092        |
| ZWILCH    | Hs. 21331  | "Zwilch, kinetochore associated, homolog (Drosophila)"    |                 |
| 55055     | BX640701   |                                                           |                 |
| TNFRSF1B  | Hs. 256278 | "Tumor necrosis factor receptor superfamily, member 1B"   | 7133 BC052977   |
| FABP5     | Hs. 408061 | Fatty acid binding protein 5 (psoriasis-associated)       | 2171            |
| BM563703  |            |                                                           |                 |
| PNPT1     | Hs. 388733 | Polynucleotide nucleotidyl transferase 1                  | 87178           |
| BC053660  |            |                                                           |                 |
| TOMM40    | Hs. 655909 | Translocase of outer mitochondrial membrane 40 homolog    |                 |
| (yeast)   | 10452      | BC047528                                                  |                 |
| NNMT      | Hs. 503911 | Nicotinamide N-methyltransferase                          | 4837 AK097984   |
| HLA-DMB   | Hs. 654428 | "Major histocompatibility complex, class II, DM beta"     | 3109            |
| AB209577  |            |                                                           |                 |
| KIAA1199  | Hs. 459088 | KIAA1199                                                  | 57214 AB103330  |

Genes downregulated with growth factors

|              |            |                                                                                       |                 |
|--------------|------------|---------------------------------------------------------------------------------------|-----------------|
| CTDSP2       | Hs. 524530 | "CTD (carboxy-terminal domain, RNA polymerase II, polypeptide A) small phosphatase 2" | 10106 NM_005730 |
| CHES1        | Hs. 434286 | Forkhead box N3                                                                       | 1112 AK055175   |
| CCNG2        | Hs. 13291  | Cyclin G2                                                                             | 901 BC032518    |
| APLP2        | Hs. 370247 | Amyloid beta (A4) precursor-like protein 2                                            | 334             |
| BX647107     |            |                                                                                       |                 |
| SEPP1        | Hs. 275775 | "Selenoprotein P, plasma, 1"                                                          | 6414 BC030009   |
| PPP2R5C      | Hs. 368264 | "Protein phosphatase 2, regulatory subunit B', gamma isoform"                         | 5527 NM_002719  |
| PINK1        | Hs. 389171 | PTEN induced putative kinase 1                                                        | 65018 AB053323  |
| LRRC1        | Hs. 646997 | Leucine rich repeat containing 1                                                      | 55227 AU119761  |
| MST1         | Hs. 349110 | Macrophage stimulating 1 (hepatocyte growth factor-like)                              |                 |
| 4485         | BC044862   |                                                                                       |                 |
| FAM53B       | Hs. 129195 | "Family with sequence similarity 53, member B"                                        | 9679            |
| NM_014661    |            |                                                                                       |                 |
| PCK1         | Hs. 1872   | Phosphoenolpyruvate carboxykinase 1 (soluble)                                         | 5105 BX648510   |
| TRAK1        | Hs. 535711 | "Trafficking protein, kinesin binding 1"                                              | 22906           |
| NM_001042646 |            |                                                                                       |                 |
| ZFYVE1       | Hs. 335106 | "Zinc finger, FYVE domain containing 1"                                               | 53349 BC053520  |
| BCL6         | Hs. 478588 | B-cell CLL/Lymphoma 6 (zinc finger protein 51)                                        | 604             |
| BX649185     |            |                                                                                       |                 |
| GBP2         | Hs. 386567 | "Guanylate binding protein 2, interferon-inducible"                                   | 2634            |
| NM_004120    |            |                                                                                       |                 |
| MXD4         | Hs. 655020 | MAX dimerization protein 4                                                            | 10608 AK024501  |
| HBP1         | Hs. 162032 | HMG-box transcription factor 1                                                        | 26959 NM_012257 |
| MLLT7        | Hs. 584654 | Forkhead box O4                                                                       | 4303 NM_005938  |
| SSBP2        | Hs. 102735 | Singl e-stranded DNA binding protein 2                                                | 23635 NM_012446 |

|            |            |                                                   |        |               |
|------------|------------|---------------------------------------------------|--------|---------------|
| HI ST2H2BE | Hs. 2178   | "Histone cluster 2, H2be"                         | 8349   | BC069193      |
| BMF        | Hs. 591104 | Bcl 2 modifying factor                            | 90427  | NM_001003940  |
| GRAMD1C    | Hs. 24583  | GRAM domain containing 1C                         | 54762  | AL133661      |
| METTL7A    | Hs. 655369 | Methyltransferase like 7A                         | 25840  | NM_014033     |
| FBX015     | Hs. 664011 | F-box protein 15                                  | 201456 | AK093252      |
| FAM63A     | Hs. 3346   | "Family with sequence similarity 63, member A"    | 55793  | AB037811      |
| FANK1      | Hs. 352591 | Fibronectin type III and ankyrin repeat domains 1 |        |               |
| 92565      | CR627249   |                                                   |        |               |
| CCT6B      | Hs. 73072  | "Chaperonin containing TCP1, subunit 6B (zeta 2)" |        |               |
| 10693      | CR933688   |                                                   |        |               |
| ING4       | Hs. 524210 | "Inhibitor of growth family, member 4"            | 51147  | NM_016162     |
| YPEL2      | Hs. 463613 | Yippee-like 2 (Drosophila)                        | 388403 | NM_001005404  |
| PCDHB14    | Hs. 658497 | Protocadherin beta 14                             | 56122  | BC050417      |
| KLHL24     | Hs. 407709 | Kelch-like 24 (Drosophila)                        | 54800  | NM_017644     |
| PNRC1      | Hs. 75969  | Proline-rich nuclear receptor coactivator 1       |        | 10957         |
| NM_006813  |            |                                                   |        |               |
| TMC4       | Hs. 355126 | Transmembrane channel-like 4                      | 147798 | BC025323      |
| HHAT       | Hs. 58650  | Hedgehog acyltransferase                          | 55733  | BC051191      |
| CHGB       | Hs. 516874 | Chromogranin B (secretogranin 1)                  |        | 1114 BC000375 |
| ARNT2      | Hs. 459070 | Aryl-hydrocarbon receptor nuclear translocator 2  |        | 9915          |
| NM_014862  |            |                                                   |        |               |
| ACSS1      | Hs. 529353 | Acyl-CoA synthetase short-chain family member 1   |        | 84532         |
| AK125058   |            |                                                   |        |               |
| GSTA2      | Hs. 94107  | Glutathione S-transferase A2                      | 2939   | BI 762502     |
